# Supplementary material for: Electronegatively substituted adamantyl units accelerate chemiexcitation of 1,2-dioxetane luminophores while preserving chemical stability
Source: Royal Society of Chemistry journal article supplement (doi:10.1039/d6sc03261c), 2026-05-13
Supplement: d6sc03261c1.pdf [file d6sc03261c1.pdf]

# Supporting Information

## **Electronegatively Substituted Adamantyl Units Accelerate Chemiexcitation of 1,2-Dioxetane Luminophores while Preserving Chemical Stability**

Thomas Leirikh<sup>a</sup>, Noa Naama<sup>a</sup>, Dingxing Wang<sup>a</sup>, Liang Ge<sup>a</sup>, Julian Ihssen<sup>b</sup>, Mario Hupfeld<sup>b</sup>, Phil S. Baran<sup>c</sup> and Doron Shabat<sup>a\*</sup>

<sup>a</sup>School of Chemistry, Faculty of Exact Sciences, Tel-Aviv University, Tel Aviv 69978, Israel.

<sup>b</sup>Nemis Technologies AG, Zurich, Switzerland.

<sup>c</sup>Department of Chemistry, Scripps Research, La Jolla, CA 92037, USA.

## Contents

|                                                        |    |
|--------------------------------------------------------|----|
| <b>Experimental Section</b> .....                      | 3  |
| Reagents .....                                         | 3  |
| Analytical Methods .....                               | 3  |
| Abbreviations .....                                    | 3  |
| Synthetic Procedures .....                             | 4  |
| Supplementary figures: .....                           | 30 |
| <b>NMR, MS and HPLC Spectra of Key Compounds</b> ..... | 33 |
| <b>References</b> .....                                | 54 |

## Experimental Section

### Reagents

All reactions requiring anhydrous conditions were carried under an Argon atmosphere. Dry solvents over molecular sieves were purchased from Thermo Scientific. All other solvents were used as supplied (A.R grade). Water used was purified using a Millipore device. Commercially available materials were purchased from Sigma Aldrich or Aaron Chemicals and used without further purification unless stated otherwise.

### Analytical Methods

$^1\text{H}$  NMR,  $^{13}\text{C}$  NMR and  $^{31}\text{P}$  NMR were acquired on a Bruker Avance-400 spectrometer, chemical shifts are reported as parts per million (ppm) and measured relative to the solvent residual peak ( $^1\text{H}$  NMR:  $\text{CDCl}_3$  = 7.26ppm,  $\text{DMSO-d}_6$  = 2.50ppm,  $\text{MeOH-d}_4$  = 3.31ppm,  $\text{C}_6\text{D}_6$  = 7.16ppm.  $^{13}\text{C}$  NMR:  $\text{CDCl}_3$  = 77.16ppm,  $\text{DMSO-d}_6$  = 39.52ppm,  $\text{MeOH-d}_4$  = 49.00, ppm  $\text{C}_6\text{D}_6$  = 128.06ppm). NMR spectra of key compounds are attached. Mass spectrometry data was recorded on Waters Xevo SQD2 spectrometer using electrospray ionization (ESI) mode. Thin-layer chromatography (TLC) was performed using Merck 60 F254 silica gel plates. Flash chromatography was performed on SiliaFlash P60 silica unless noted otherwise. Analytical reverse-phase high-pressure liquid chromatography (RP-HPLC) was performed using Hitachi LaChrome *Elite* with a Thermo-Fischer Hypersil GOLD™ 250x4.6 (mm) C18 column with HPLC grade acetonitrile (ACN) and  $\text{H}_2\text{O}$  + 0.1% trifluoroacetic acid (TFA) as eluents (gradient is given in parentheses as ACN %). Irradiation reactions were performed using a 35W, 2700K LED lamp. Chemiluminescent measurements were recorded on Molecular Devices Spectramax iD3. Preparative RP-HPLC was conducted using ECOM LC preparative system with Phenomenex Luna  $5\mu\text{m}$  C18(2) 100Å 250X21.2 mm column.

### Abbreviations

ACN - Acetonitrile, DCM - Dichloromethane, DMF - N,N'-Dimethylformamide,  $\text{Et}_3\text{N}$  - Triethylamine, EtOAc - Ethyl acetate, MeOH - Methanol, THF - Tetrahydrofuran, Hex - Hexanes, LDA - Lithium diisopropylamide, DBTL - Dibutyltin dilaurate, mCPBA - meta-chloroperoxybenzoic acid, sat. - saturated,  $\text{Et}_2\text{O}$  - Diethyl ether, TBAF - Tetrabutylammonium fluoride, NBS - N-bromosuccinimide,  $\text{BF}_3\cdot\text{Et}_2\text{O}$  - Boron trifluoride diethyl etherate, CAM - Cerium ammonium molybdate, N/A - Not available, AcOH- Acetic acid, PBS - phosphate buffered saline.

## Synthetic Procedures

Synthesis of Diox 1<sup>[1]</sup>,  $\beta$ -gal-diox 1<sup>[2]</sup> was previously reported.

### Lithium diisopropylamide (LDA) preparation general procedure:

To a heat gun-dried flask under argon was added dry THF and diisopropylamine (1.1eq), then, the solution was cooled to 0°C. n-butyllithium (<sup>n</sup>BuLi) solution (2.5M in Hexanes, 1eq) was added dropwise using a syringe to obtain a light yellowish solution. After the addition, the solution was stirred for 1 minute and cooled to -78°C for the Horner-Wadsworth-Emmons reaction.

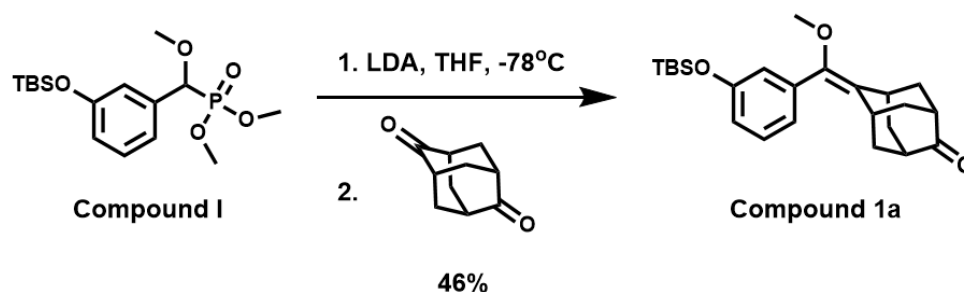

### Compound 1a:

To a freshly prepared solution of LDA (1.66 mmol, 3eq) in THF (4 mL) under argon, a solution of phosphonate (Compound I)<sup>[2]</sup> (200mg, 0.55mmol in 2mL, 1eq) in dry THF is added dropwise at -78°C, the solution turns dark orange. Following 20 minutes of stirring, a solution of adamantane-2,6-dione (180mg, 1.1mmol in 2mL, 2eq) in dry THF is added all at once into the flask. The reaction is stirred for additional 20 minutes at -78°C and then allowed to reach room temperature. The reaction is quenched with sat. NH<sub>4</sub>Cl solution and extracted with Et<sub>2</sub>O. The combined organic layers were washed with sat. NaCl solution and dried over anhydrous Na<sub>2</sub>SO<sub>4</sub>, the solvent was evaporated under reduced pressure. Purification of the crude product by column chromatography (20% EtOAc in Hex) afforded compound 1a (100mg, 46%) as a yellowish oil.

<sup>1</sup>H-NMR (400MHz, CDCl<sub>3</sub>):  $\delta$ (ppm) = 7.23 (t, J = 7.5 Hz, 1H), 6.91 (d, J = 7.5 Hz, 1H), 6.80 (s, 2H), 3.39 (s, 1H), 3.32 (s, 3H), 2.69 (s, 1H), 2.62 (s, 2H), 2.15 (s, 4H), 2.04 (q, J = 13.0 Hz, 5H), 0.98 (s, 9H), 0.19 (s, 6H).

<sup>13</sup>C-NMR (101MHz, CDCl<sub>3</sub>):  $\delta$ (ppm) = 217.8, 155.7, 145.4, 135.9, 129.4, 126.6, 122.7, 121.2, 120.1, 77.5, 77.2, 76.9, 57.6, 47.0, 40.7, 40.5, 31.4, 29.1, 25.8, 18.4, -4.3.

MS (ES<sup>+</sup>): m/z calc for C<sub>24</sub>H<sub>34</sub>O<sub>3</sub>Si: 398.2; found: 399.6 [M+H]<sup>+</sup>.

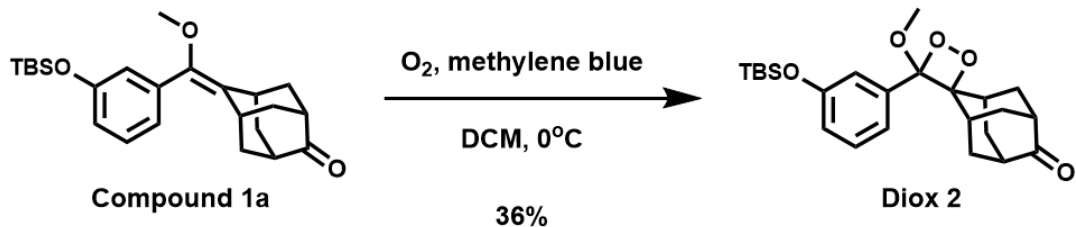

### Diox 2:

Compound **1a** (31mg, 0.078mmol) was dissolved in DCM (10mL), a catalytic amount of methylene blue (<1 mg) was added to the solution. Oxygen was bubbled through the solution while irradiating with a yellow light at 0°C. The reaction was monitored by RP-HPLC (70-100% gradient). Upon completion, the solvent was evaporated under reduced pressure at 20°C. The crude product was purified by preparative RP-HPLC. The acetonitrile was evaporated under reduced pressure at 20°C following a freeze drying to afford **Diox 2** (12.1mg, 36%) as a white solid.

$^1\text{H-NMR}$  (400MHz,  $\text{CDCl}_3$ ):  $\delta$ (ppm) = 7.33 (t,  $J$  = 7.2 Hz, 2H), 6.92 (dd,  $J$  = 9.0, 2.3 Hz, 2H), 3.28 (s, 3H), 3.20 (s, 1H), 2.39 – 2.33 (m, 2H), 2.30 (s, 1H), 2.22 (dq,  $J$  = 13.4, 2.9 Hz, 1H), 2.16 – 2.01 (m, 3H), 1.85 (dq,  $J$  = 13.5, 2.9 Hz, 1H), 1.75 (dq,  $J$  = 13.4, 2.9 Hz, 1H), 1.50 (dq,  $J$  = 13.6, 2.7 Hz, 1H), 1.34 (dq,  $J$  = 13.7, 3.1 Hz, 1H), 0.99 (s, 9H), 0.20 (s, 6H).

$^{13}\text{C-NMR}$  (101MHz,  $\text{CDCl}_3$ ):  $\delta$ (ppm) = 216.6, 156.2, 135.6, 129.8, 121.9, 111.7, 93.3, 50.3, 44.5, 44.3, 36.2, 34.3, 33.9, 33.0, 32.6, 31.0, 25.8, 18.4, -4.2.

**MS (ES+)**:  $m/z$  calc for  $\text{C}_{24}\text{H}_{34}\text{O}_5\text{Si}$ : 430.2; found: 494.6  $[\text{M}+\text{ACN}+\text{Na}]^+$ .

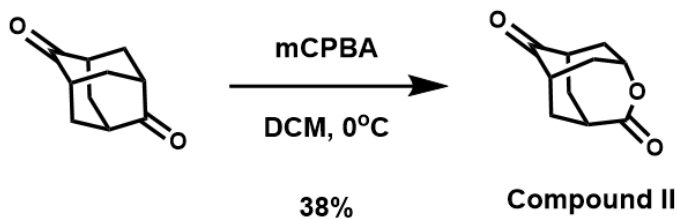

### Compound II:

adamantane-2,6-dione (1g, 6.1mmol, 1eq) was dissolved in DCM (50mL), the solution was cooled to 0°C and mCPBA was added portion-wise. The reaction was stirred for 10 minutes and then allowed to warm to RT. The reaction was monitored by TLC, upon completion, sat.  $\text{NaHCO}_3$  and sat.  $\text{Na}_2\text{S}_2\text{O}_3$  were added to the flask and the product was extracted with DCM.

The combined organic layers were washed by sat. NaCl and dried over anhydrous Na<sub>2</sub>SO<sub>4</sub>, the solvent was evaporated under reduced pressure. The crude product was purified by column chromatography (30% to 60% EtOAc in Hex) to afford **Compound II** (418mg, 38%) as a white solid.

<sup>1</sup>H-NMR (400MHz, CDCl<sub>3</sub>): δ(ppm) = 4.55 (tt, *J* = 4.4, 2.2 Hz, 1H), 3.17 (tt, *J* = 5.9, 1.7 Hz, 1H), 2.68 (s, 2H), 2.48 – 2.31 (m, 5H), 2.30 – 2.27 (m, 1H), 2.20 (dddd, *J* = 13.3, 5.8, 2.9, 1.4 Hz, 2H).

<sup>13</sup>C-NMR (101MHz, CDCl<sub>3</sub>): δ(ppm) = 215.2, 176.8, 71.1, 44.8, 40.0, 38.8, 33.9.

MS (ES+): *m/z* calc for C<sub>10</sub>H<sub>12</sub>O<sub>3</sub>: 180.1 ; found: N/A.

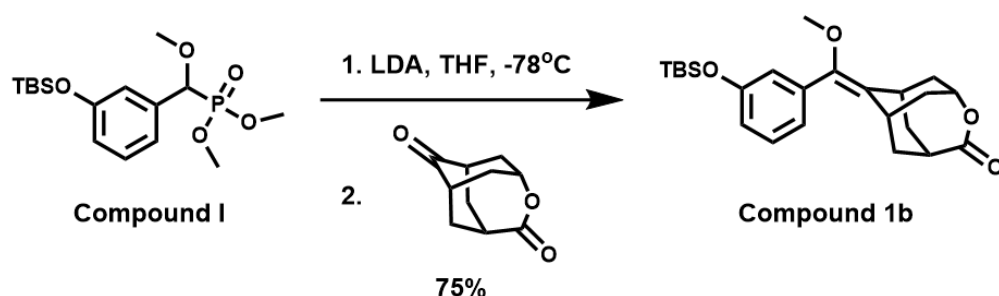

#### Compound 1b:

To a freshly prepared solution of LDA (1.66 mmol, 3eq) in THF (4 mL) under argon a solution of phosphonate (**Compound I**) (200mg, 0.55mmol in 2mL, 1eq) in dry THF is added dropwise at -78°C, the solution turns dark orange. Following 20 minutes of stirring, a solution of **Compound II** (200mg, 1.1mmol in 2mL, 2eq) in dry THF is added all at once into the flask. The reaction is stirred for additional 20 minutes at -78°C and then allowed to reach room temperature. The reaction is quenched with sat. NH<sub>4</sub>Cl solution and extracted with Et<sub>2</sub>O. The combined organic layers were washed with sat. NaCl solution and dried over anhydrous Na<sub>2</sub>SO<sub>4</sub>, the solvent was evaporated under reduced pressure. Purification of the crude product by column chromatography (20% to 40% EtOAc in Hex) afforded **Compound 1b** (172mg, 75%) as a white solid.

<sup>1</sup>H-NMR (400MHz, CDCl<sub>3</sub>): δ(ppm) = 7.21 (t, *J* = 7.6 Hz, 1H), 6.82 (dd, *J* = 16.3, 7.8 Hz, 2H), 6.74 (s, 1H), 4.51 (s, 1H), 3.43 (s, 1H), 3.27 (s, 3H), 3.11 (s, 1H), 2.70 (s, 1H), 2.20 – 1.90 (m, 7H), 1.88 – 1.80 (m, 1H), 0.96 (s, 9H), 0.18 (s, 6H).

<sup>13</sup>C-NMR (101MHz, CDCl<sub>3</sub>): δ(ppm) = 178.8, 155.7, 146.0, 135.5, 129.4, 123.9, 122.3, 120.9, 120.2, 73.4, 57.4, 41.4, 37.7, 37.4, 32.9, 32.6, 30.6, 28.1, 25.7, 18.3, -4.4.

MS (ES+): *m/z* calc for C<sub>24</sub>H<sub>34</sub>O<sub>4</sub>Si: 414.2; found: 415.6 [M+H]<sup>+</sup>.



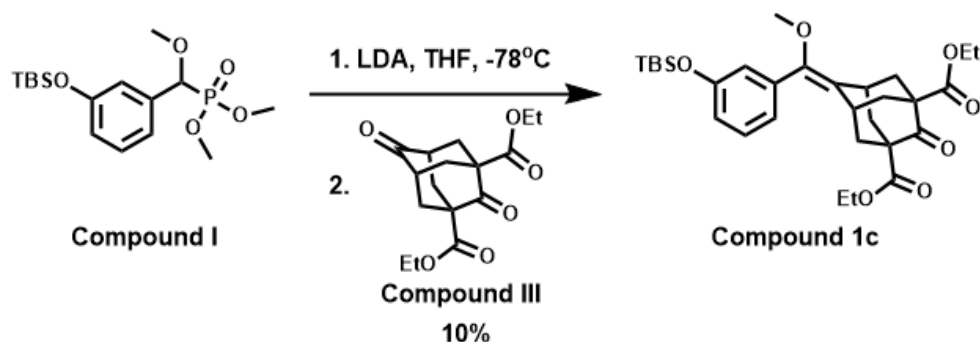

### Compound 1c:

To a freshly prepared solution of LDA (1.66 mmol, 3eq) in THF (4 mL) under argon a solution of phosphonate (Compound I) (200mg, 0.55mmol in 2mL, 1eq) in dry THF is added dropwise at -78°C, the solution turns dark orange. Following 20 minutes of stirring, a solution of compound III<sup>[3]</sup> (254mg, 0.82mmol in 2mL, 1.5eq) in dry THF is added all at once into the flask. The reaction is stirred for additional 20 minutes at -78°C and then allowed to reach room temperature. The reaction is quenched with sat. NH<sub>4</sub>Cl solution and extracted with Et<sub>2</sub>O. The combined organic layers were washed with sat. NaCl solution and dried over anhydrous Na<sub>2</sub>SO<sub>4</sub>, the solvent was evaporated under reduced pressure. Purification of the crude product by column chromatography (5% to 10% EtOAc in Hex) afforded compound **1c** (30mg, 10%) as a white solid.

<sup>1</sup>H-NMR (400MHz, CDCl<sub>3</sub>): δ(ppm) = 7.27 – 7.20 (m, 1H), 6.86 (dd, *J* = 18.7, 7.7 Hz, 2H), 6.78 (s, 1H), 4.19 (q, 4H), 3.60 (s, 1H), 3.31 (s, 3H), 2.88 (s, 1H), 2.66 (d, *J* = 12.8 Hz, 2H), 2.52 (d, *J* = 12.6 Hz, 2H), 2.17 (d, *J* = 12.6 Hz, 2H), 2.08 (d, *J* = 12.5 Hz, 2H), 1.27 (t, *J* = 6.8 Hz, 6H), 0.99 (s, 9H), 0.20 (s, 6H).

<sup>13</sup>C-NMR (101MHz, CDCl<sub>3</sub>): δ(ppm) = 206.2, 171.0, 155.9, 146.3, 135.4, 129.5, 123.1, 122.6, 121.1, 120.4, 61.3, 58.1, 57.6, 42.1, 41.9, 31.1, 29.8, 28.6, 25.8, 18.4, 14.3, -4.3.

MS (ES<sup>+</sup>): *m/z* calc for C<sub>30</sub>H<sub>42</sub>O<sub>7</sub>Si: 542.3; found: 543.7 [M+H]<sup>+</sup>.

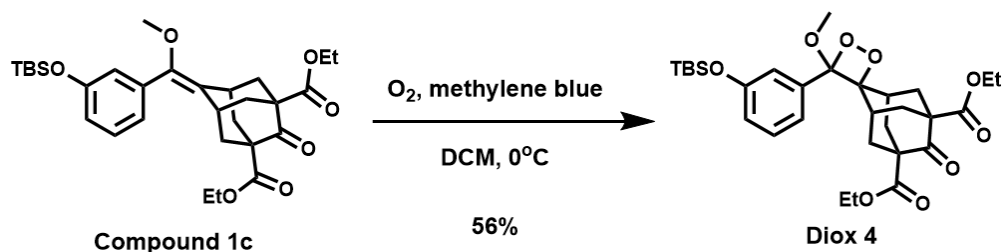

#### Diox 4:

Compound 1c (14mg, 0.026mmol) was dissolved in DCM (10mL), a catalytic amount of methylene blue (<1 mg) was added to the solution. Oxygen was bubbled through the solution while irradiating with a yellow light at 0°C. The reaction was monitored by RP-HPLC (70-100% gradient). Upon completion, the solvent was evaporated under reduced pressure at 20°C. The crude product was purified by preparative RP-HPLC. The acetonitrile was evaporated under reduced pressure at 20°C following a freeze drying to afford **Diox 4** (8.3mg, 56%) as a white solid.

<sup>1</sup>H-NMR (400MHz, CDCl<sub>3</sub>): δ(ppm) = 7.54 – 7.29 (m, 2H), 6.93 (dd, J = 8.7, 2.2 Hz, 2H), 4.24 – 4.09 (m, 4H), 3.39 (s, 1H), 3.27 (s, 3H), 2.57 (dt, J = 13.8, 3.3 Hz, 1H), 2.48 (s, 1H), 2.38 (dt, J = 13.9, 2.6 Hz, 1H), 2.27 – 2.17 (m, 3H), 2.14 (dt, J = 13.9, 3.0 Hz, 1H), 2.02 (d, J = 13.7 Hz, 1H), 1.81 (s, 1H), 1.42 (dt, J = 14.0, 2.5 Hz, 1H), 1.27 – 1.21 (m, 6H), 0.98 (s, 8H), 0.18 (s, 6H).

<sup>13</sup>C-NMR (101MHz, CDCl<sub>3</sub>): δ(ppm) = 205.3, 170.3, 135.2, 130.2, 121.8, 111.3, 91.8, 61.5, 61.5, 56.0, 55.9, 50.4, 37.9, 36.1, 35.3, 34.6, 32.6, 31.1, 29.9, 25.8, 18.4, 14.2, 14.2, -4.3.

MS (ES<sup>+</sup>): m/z calc for C<sub>30</sub>H<sub>42</sub>O<sub>9</sub>Si: 574.3; found: 575.6 [M+H]<sup>+</sup>.

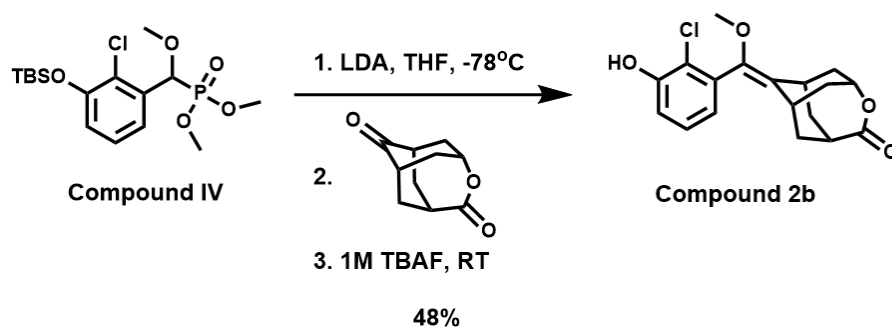

#### Compound 2b:

To a freshly prepared solution of LDA (1.53 mmol, 3eq) in THF (4 mL) under argon a solution of phosphonate (Compound IV)<sup>[4]</sup> (200mg, 0.51mmol in 2mL, 1eq) in dry THF is added dropwise at -78°C, the solution turns dark orange. Following 20 minutes of stirring, a solution

of compound **2b** (182mg, 1.0mmol in 2mL, 2eq) in dry THF is added all at once into the flask. The reaction is stirred for additional 20 minutes at -78°C and then allowed to reach room temperature. After completion of the reaction indicated by TLC, TBAF (0.56ml, 0.56mmol, 1M in THF) is added into the reaction flask. The reaction is further monitored by TLC, upon completion, the reaction is quenched with sat. NH<sub>4</sub>Cl solution and extracted with EtOAc. The combined organic layers were washed with sat. NaCl solution and dried over anhydrous Na<sub>2</sub>SO<sub>4</sub>, the solvent was evaporated under reduced pressure. Purification of the crude product by column chromatography (20% to 40% EtOAc in Hex) afforded compound **2b** (82mg, 48%) as a white solid.

<sup>1</sup>H-NMR (400MHz, CDCl<sub>3</sub>): δ(ppm) = 7.19 (t, *J* = 7.8 Hz, 1H), 7.05 (dd, *J* = 8.2, 1.5 Hz, 1H), 6.80 (t, *J* = 7.5 Hz, 1H), 4.55 – 4.50 (m, 1H), 3.48 (s, 1H), 3.31 (s, 3H), 3.12 (s, 1H), 2.26 (s, 1H), 2.20 – 1.89 (m, 8H).

<sup>13</sup>C-NMR (101MHz, CDCl<sub>3</sub>): δ(ppm) = 179.0, 179.0, 152.1, 142.3, 133.7, 127.8, 123.4, 123.3, 116.4, 73.5, 73.4, 56.6, 41.3, 37.7, 37.4, 37.3, 37.1, 32.8, 32.5, 32.4, 32.2, 31.0, 29.7, 27.6. (mixture of E/Z isomers)

MS (ES<sup>+</sup>): *m/z* calc for C<sub>18</sub>H<sub>19</sub>ClO<sub>4</sub>: 334.1; found: 333.2 [M-H]<sup>+</sup>.

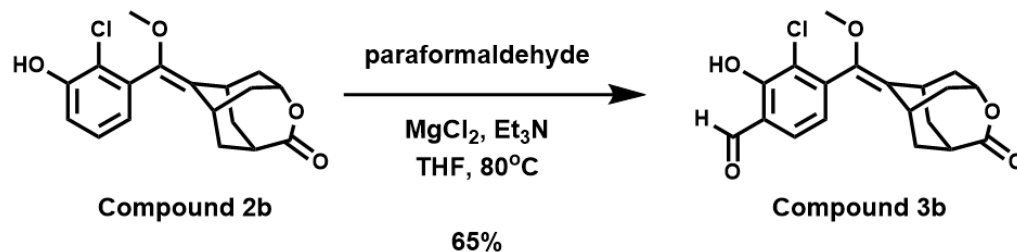

### Compound 3b:

In a pressure flask, compound **2a** (82mg, 0.24mmol, 1eq) is dissolved in THF, Et<sub>3</sub>N (0.3ml, 1.92mmol, 8eq) is added, followed by addition of paraformaldehyde (115mg, 3.84mmol, 16eq) and anhydrous MgCl<sub>2</sub> (91mg, 0.96mmol, 4eq). The pressure flask is immediately sealed and inserted into a pre-heated 80°C oil bath. The reaction turns bright yellow. After 4 hours, the reaction was cooled to RT, quenched with sat. NH<sub>4</sub>Cl solution and extracted with EtOAc. The organic layer is washed with sat. NaCl solution and dried over anhydrous Na<sub>2</sub>SO<sub>4</sub>. The solvent was evaporated under reduced pressure, purification of the crude product by column chromatography (20% to 40% EtOAc in Hex) afforded compound **3b** (57mg, 65%) as a white solid.

<sup>1</sup>H-NMR (400MHz, CDCl<sub>3</sub>): δ(ppm) = 9.92 (s, 1H), 7.54 (dd, *J* = 7.8, 2.9 Hz, 1H), 6.96 (t, *J* = 8.1 Hz, 1H), 4.61 – 4.48 (m, 1H), 3.48 (s, 1H), 3.34 (s, 3H), 3.14 – 3.08 (m, 1H), 2.23 – 2.08 (m, 5H), 2.03 – 1.89 (m, 4H).

<sup>13</sup>C-NMR (101MHz, CDCl<sub>3</sub>): δ(ppm) = 195.8, 178.6, 178.5, 157.7, 141.9, 141.2, 131.4, 131.4, 125.6, 122.3, 122.2, 120.8, 73.2, 73.0, 57.0, 41.2, 41.1, 37.8, 37.4, 37.0, 37.0, 32.9, 32.5, 32.2, 32.0, 31.1, 29.7, 27.7. (mixture of E/Z isomers)

MS (ES<sup>+</sup>): *m/z* calc for C<sub>19</sub>H<sub>19</sub>ClO<sub>5</sub>: 362.1; found: 361.1 [M-H]<sup>-</sup>.

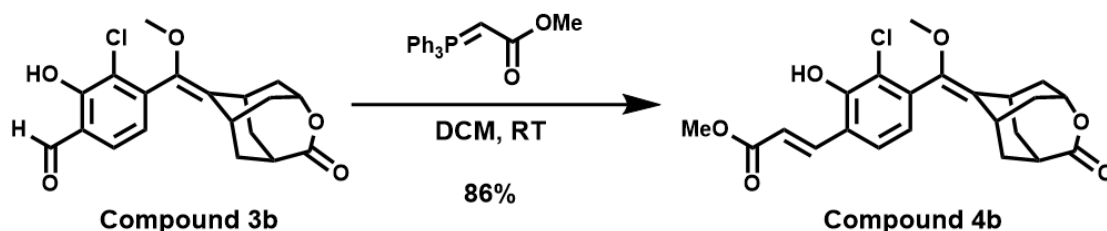

#### Compound 4b:

Compound 3b (104mg, 0.29mmol, 1eq) is dissolved in DCM, followed by addition of Methyl-2-(triphenylphosphoranylidene)acetate (115mg, 0.34mmol, 1.2eq), the reaction changes color to yellow immediately (highly fluorescent under UV light). After 5 minutes of stirring, the reaction is quenched with sat. NH<sub>4</sub>Cl solution and extracted with EtOAc. The combined organic layers are washed with sat. NaCl solution and dried over anhydrous Na<sub>2</sub>SO<sub>4</sub>. The solvent was evaporated under reduced pressure, purification of the crude product by column chromatography (30% to 40% EtOAc in Hex) afforded compound 4b (103mg, 86%) as a white solid.

<sup>1</sup>H-NMR (400MHz, CDCl<sub>3</sub>): δ(ppm) = 7.93 (d, *J* = 16.2 Hz, 1H), 7.42 (d, *J* = 7.9 Hz, 1H), 6.86 (d, *J* = 6.8 Hz, 1H), 6.67 – 6.58 (m, 1H), 6.28 (s, 1H), 4.53 (s, 1H), 3.82 (s, 3H), 3.48 (s, 1H), 3.32 (d, *J* = 1.1 Hz, 3H), 3.13 (s, 1H), 2.29 (s, 1H), 2.19 – 1.89 (m, 12H).

<sup>13</sup>C-NMR (101MHz, CDCl<sub>3</sub>): δ(ppm) = 178.8, 167.6, 150.8, 142.0, 138.8, 135.1, 127.3, 123.3, 123.0, 120.5, 116.0, 114.2, 73.3, 73.3, 57.0, 52.0, 41.3, 37.9, 37.5, 37.4, 37.2, 33.0, 32.6, 32.5, 32.4, 32.1, 31.8, 31.2, 29.8, 27.8, 22.8, 14.3.

MS (ES<sup>+</sup>): *m/z* calc for C<sub>22</sub>H<sub>23</sub>ClO<sub>6</sub>: 418.1; found: 417.3 [M-H]<sup>-</sup>.

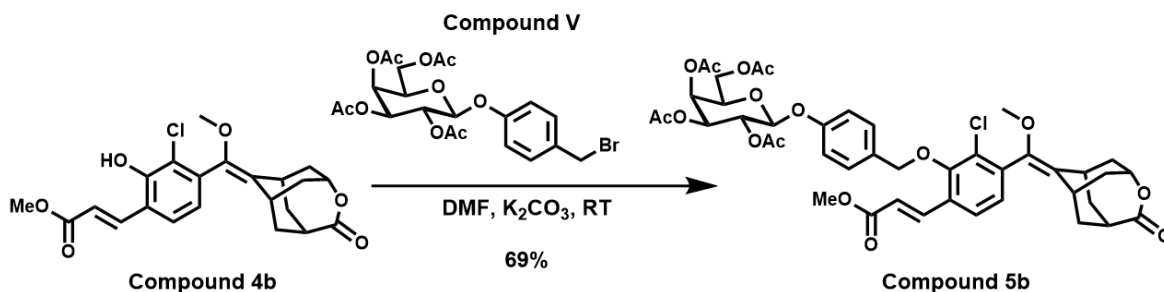

### Compound 5b:

Compound **4b** (50mg, 0.2mmol, 1eq) is dissolved in dry DMF (2mL) followed by the addition of anhydrous K<sub>2</sub>CO<sub>3</sub> (49mg, 0.36mmol, 3eq). The reaction is stirred for 5 min followed by the addition of compound **V**<sup>[2]</sup> (67mg, 0.086mmol, 1eq). Upon completion as indicated by TLC, the reaction is quenched with sat. NH<sub>4</sub>Cl solution and sat. Na<sub>2</sub>S<sub>2</sub>O<sub>3</sub>, extracted three times with EtOAc. The organic layers are combined, washed with sat. NaCl solution and dried over anhydrous Na<sub>2</sub>SO<sub>4</sub>. The solvent was evaporated under reduced pressure, purification of the crude product by column chromatography (30% EtOAc in Hex) afforded compound **5b** (70mg, 69%) as a white solid.

<sup>1</sup>H-NMR (400MHz, CDCl<sub>3</sub>): δ(ppm) = 7.92 (d, *J* = 16.2 Hz, 1H), 7.48 (dd, *J* = 7.9, 2.8 Hz, 1H), 7.42 (d, *J* = 8.5 Hz, 2H), 7.07 (d, *J* = 8.1 Hz, 1H), 7.03 (d, *J* = 3.5 Hz, 2H), 6.47 (d, *J* = 16.2 Hz, 1H), 5.48 (dd, *J* = 11.3, 3.1 Hz, 2H), 5.15 – 5.10 (m, 1H), 5.05 (d, *J* = 8.0 Hz, 1H), 4.95 (s, 2H), 4.53 (s, 1H), 4.22 (dd, *J* = 7.0, 4.2 Hz, 1H), 4.16 (d, *J* = 4.1 Hz, 1H), 4.07 (t, *J* = 6.7 Hz, 1H), 3.81 (s, 3H), 3.49 (s, 1H), 3.32 (s, 3H), 3.12 (s, 1H), 2.31 (td, *J* = 7.6, 2.6 Hz, 1H), 2.22 (d, *J* = 7.2 Hz, 1H), 2.19 (s, 3H), 2.16 – 2.10 (m, 2H), 2.07 (s, 3H), 2.07 (s, 3H), 2.02 (s, 3H), 2.00 – 1.87 (m, 5H)

<sup>13</sup>C-NMR (101MHz, CDCl<sub>3</sub>): δ(ppm) = 178.7, 178.6, 170.4, 170.3, 170.2, 169.4, 167.0, 157.3, 153.8, 141.8, 138.4, 136.6, 130.4, 127.4, 127.3, 125.6, 124.9, 120.6, 117.0, 99.7, 75.8, 73.3, 73.1, 71.1, 70.8, 68.6, 66.8, 62.1, 61.3, 56.8, 51.9, 41.2, 37.8, 37.4, 37.1, 32.9, 32.5, 32.2, 31.9, 27.7, 27.2, 25.6, 24.9, 22.7, 20.7, 20.7, 20.6, 14.1.

MS (ES<sup>+</sup>): *m/z* calc for C<sub>43</sub>H<sub>47</sub>ClO<sub>16</sub>: 854.3; found: 878.0 [M+Na]<sup>+</sup>.

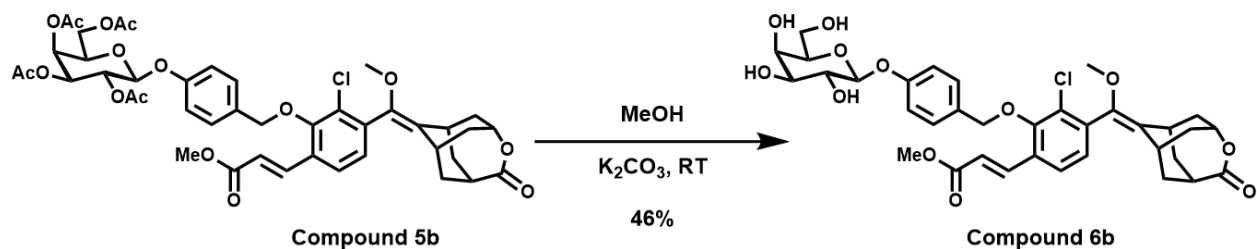

### Compound 6b:

Compound **5b** (35mg, 0.041mmol, 1eq) was dissolved in MeOH (2mL) followed by the addition of few grains of anhydrous  $\text{K}_2\text{CO}_3$ . The reaction is monitored by RP-HPLC (30-100% ACN gradient). Upon completion, the reaction is quenched by sat.  $\text{NH}_4\text{Cl}$  solution and extracted 3 times with EtOAc. The organic extracts are combined, washed with sat. NaCl solution and dried over anhydrous  $\text{Na}_2\text{SO}_4$ . The solvent was evaporated under reduced pressure to yield compound **6b** (13mg, 46%) as a white solid. The crude product was used without further purification.

$^1\text{H-NMR}$  (400MHz,  $\text{CDCl}_3$ ): 7.82 (d,  $J = 16.1$  Hz, 1H), 7.45 (d,  $J = 7.5$  Hz, 1H), 7.27 (d,  $J = 5.0$  Hz, 2H), 7.06 – 6.99 (m, 1H), 6.97 (d,  $J = 6.8$  Hz, 2H), 6.41 (d,  $J = 16.1$  Hz, 1H), 4.99 (d,  $J = 7.9$  Hz, 1H), 4.88 (s, 2H), 4.51 (s, 1H), 4.14 (s, 1H), 4.00 (s, 1H), 3.86 (s, 2H), 3.77 (s, 3H), 3.64 (s, 2H), 3.44 (s, 1H), 3.29 (s, 3H), 3.08 (s, 1H), 2.15 (s, 1H), 2.10 – 1.84 (m, 9H).

$^{13}\text{C-NMR}$  (101MHz,  $\text{CDCl}_3$ ):  $\delta(\text{ppm}) = 179.7, 167.4, 157.5, 153.6, 141.9, 138.9, 136.7, 131.1, 130.7, 130.0, 127.3, 125.7, 124.8, 124.7, 120.4, 116.6, 101.0, 76.2, 74.4, 73.9, 73.4, 71.2, 69.5, 62.0, 56.9, 52.2, 41.3, 37.6, 37.4, 37.1, 32.5, 32.2, 31.2, 27.7.$

**MS (ES+):**  $m/z$  calc for  $\text{C}_{35}\text{H}_{39}\text{ClO}_{12}$ : 686.2; found: 725.8  $[\text{M}+\text{K}]^+$ .

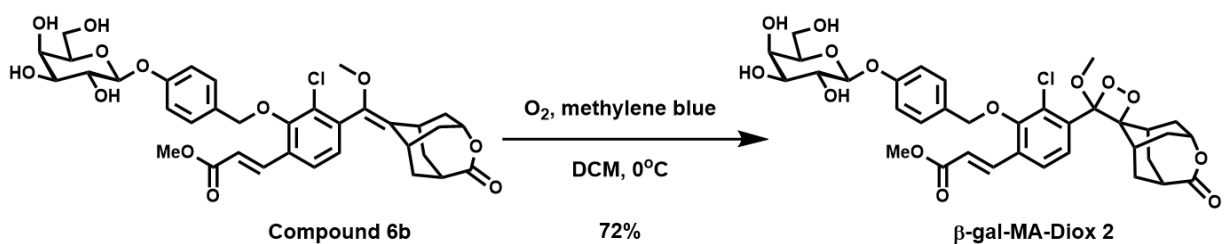

### $\beta$ -gal-MA-Diox 2:

Compound **6b** (13mg, 0.019mmol) was dissolved in DCM (10mL), a catalytic amount of methylene blue (<1 mg) was added to the solution. Oxygen was bubbled through the solution while irradiating with a yellow light. The reaction was monitored by RP-HPLC (30-100% ACN gradient). – elution time:  $\beta$ -gal-MA-Diox 2: 11.0min. Upon completion, the solvent was

evaporated under reduced pressure at 20°C. The crude product was purified by preparative RP-HPLC. The acetonitrile was evaporated under reduced pressure at 20°C following a freeze drying to afford **β-gal-MA-Diox 2** (9.8mg, 72%) as a white solid.

<sup>1</sup>H-NMR (400MHz, MeOD): 7.94 – 7.77 (m, 3H), 7.33 (dd, *J* = 8.9, 2.1 Hz, 2H), 7.09 (dt, *J* = 8.6, 2.5 Hz, 2H), 6.60 (dt, *J* = 16.2, 0.9 Hz, 1H), 4.99 – 4.94 (m, 2H), 4.34 (d, *J* = 8.8 Hz, 1H), 3.90 (dd, *J* = 3.4, 1.2 Hz, 1H), 3.81 (d, *J* = 0.8 Hz, 3H), 3.80 – 3.76 (m, 3H), 3.77 – 3.74 (m, 1H), 3.70 (dddd, *J* = 8.0, 6.9, 4.9, 1.5 Hz, 1H), 3.59 (ddd, *J* = 9.8, 3.3, 2.1 Hz, 1H), 3.21 – 3.19 (m, 3H), 2.86 – 2.79 (m, 1H), 2.80 – 2.56 (m, 1H), 2.21 – 1.38 (m, 9H). Mixture of diastereomers.

<sup>13</sup>C-NMR (101MHz, MeOD): δ(ppm) = 179.3, 179.1, 167.1, 158.3, 154.3, 138.0, 138.0, 134.2, 132.3, 130.6, 130.5, 129.5, 128.4, 127.5, 125.7, 121.0, 116.4, 116.3, 110.9, 101.5, 101.5, 93.1, 92.8, 76.0, 75.6, 73.4, 72.1, 71.4, 70.9, 68.8, 61.0, 51.1, 48.9, 48.8, 39.4, 38.7, 33.3, 32.2, 32.1, 32.0, 30.9, 30.4, 30.3, 30.2, 27.9, 26.7, 26.6, 25.6, 25.2. Mixture of diastereomers.

MS (ES+): *m/z* calc for C<sub>35</sub>H<sub>41</sub>ClO<sub>12</sub>: 718.2; found: 719.7 [M+H]<sup>+</sup>.

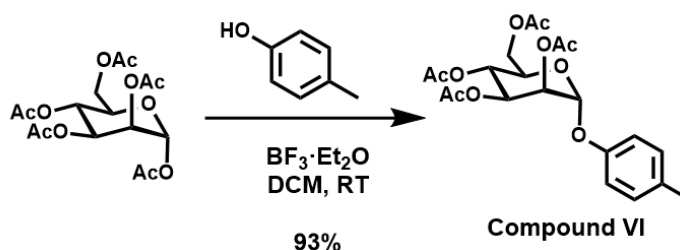

### Compound VI:

α-d-mannose pentaacetate (500mg, 1.28mmol, 1eq) is dissolved in dry DCM (5mL) followed by the addition of BF<sub>3</sub>·Et<sub>2</sub>O (0.49ml, 3.84mmol, 3eq). After stirring for a few minutes, para-cresol (277mg, 2.56, 2eq) is added and the reaction is stirred overnight. The starting material consumption is monitored by TLC using CAM stain, after completion, the reaction was slowly quenched with sat. NaHCO<sub>3</sub> solution and extracted with EtOAc. The combined organic layers were washed with sat. NaCl solution and dried over anhydrous Na<sub>2</sub>SO<sub>4</sub>. The solvent was evaporated under reduced pressure, purification of the crude product by column chromatography afforded compound VI (561mg, 93%) as a white solid.

<sup>1</sup>H-NMR (400MHz, CDCl<sub>3</sub>): δ(ppm) = 7.08 (d, *J* = 8.3 Hz, 2H), 6.96 (d, *J* = 8.6 Hz, 2H), 5.55 (dd, *J* = 10.0, 3.5 Hz, 1H), 5.47 (d, *J* = 1.7 Hz, 1H), 5.43 (dd, *J* = 3.5, 1.9 Hz, 1H), 5.35 (t, *J* = 10.0 Hz, 1H), 4.27 (dd, *J* = 12.0, 5.1 Hz, 1H), 4.15 – 4.03 (m, 2H), 2.29 (s, 3H), 2.18 (s, 3H), 2.04(s, 3H), 2.03 (d, *J* = 2.0 Hz, 6H).

$^{13}\text{C-NMR}$  (101MHz,  $\text{CDCl}_3$ ):  $\delta(\text{ppm}) = 170.7, 170.1, 170.0, 169.9, 153.6, 132.6, 130.1, 116.5, 96.1, 69.6, 69.1, 69.0, 66.1, 62.3, 21.0, 20.8, 20.8, 20.6$ .

**MS (ES+):**  $m/z$  calc for  $\text{C}_{21}\text{H}_{26}\text{O}_{10}$ : 438.2; found: 461.5  $[\text{M}+\text{Na}]^+$ .

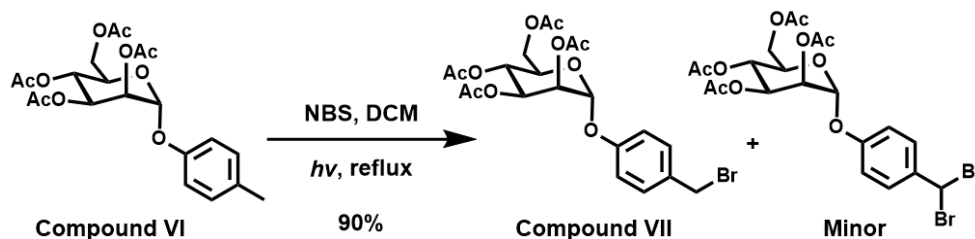

### Compound VII:

Compound VI (100mg, 0.44mmol, 1eq) is dissolved in dry DCM (20mL) followed by the addition of NBS (78mg, 0.44mmol, 1eq). The reaction was heated to reflux and irradiated by a yellow lamp for 20 min. The reaction completion is monitored by RP-HPLC (30-100% ACN gradient) – elution times: Compound VI – 14.0min (273nm max); compound VII – 14.3min (239nm max); dibromo product – 11.2min (267nm max). After consumption of the starting material, the solvent was evaporated to about 3mL and the mixture was directly loaded on a silica column, eluting starting with 20% DCM in Hex up to 100% DCM to afford compound VII and dibromo product mixture (108mg, compound VII : dibromo = 5:1, 90%) as a yellowish solid. The crude mixture was further reacted as obtained.

$^1\text{H-NMR}$  (Major) (400MHz,  $\text{CDCl}_3$ ):  $\delta(\text{ppm}) = 7.33$  (d, 2H), 7.05 (dt,  $J = 6.8, 2.4$  Hz, 2H), 5.54 (dt,  $J = 10.0, 2.7$  Hz, 2H), 5.43 (dd,  $J = 3.5, 1.8$  Hz, 1H), 5.36 (t,  $J = 10.0$  Hz, 1H), 4.47 (s, 2H), 4.30 – 4.23 (m, 1H), 4.09 – 4.03 (m, 2H), 2.19 (s, 3H), 2.05 (s, 3H), 2.03 (s, 3H), 2.02 (s, 3H).

$^1\text{H-NMR}$  (Minor) (400MHz,  $\text{CDCl}_3$ ):  $\delta(\text{ppm}) = 7.52$  (d,  $J = 8.8$  Hz, 2H), 7.07 (d,  $J = 10.2$  Hz, 2H), 6.63 (s, 1H), 5.54 (dt,  $J = 10.0, 2.7$  Hz, 2H), 5.43 (dd,  $J = 3.5, 1.8$  Hz, 1H), 5.36 (t,  $J = 10.0$  Hz, 1H), 4.30 – 4.23 (m, 1H), 4.09 – 4.03 (m, 2H), 2.19 (s, 3H), 2.05 (s, 3H), 2.03 (s, 3H), 2.02 (s, 3H).

(Aliphatic peaks of the mixture overlap)

$^{13}\text{C-NMR}$  (101MHz,  $\text{CDCl}_3$ ):  $\delta(\text{ppm}) = 170.6, 170.1, 169.8, 155.6, 132.6, 130.6, 128.2, 116.8, 116.4, 95.8, 77.5, 77.1, 76.8, 69.4, 68.9, 66.0, 62.2, 33.2, 29.8, 21.0, 20.8, 14.2$ .

**MS (Major) (ES+):**  $m/z$  calc for  $\text{C}_{21}\text{H}_{25}^{81}\text{BrO}_{10}$ : 518.1; found: 541.4  $[\text{M}+\text{Na}]^+$ .

**MS (Minor) (ES+):**  $m/z$  calc for  $\text{C}_{21}\text{H}_{24}^{81}\text{Br}_2\text{O}_{10}$ : 596.0; found: 619.4  $[\text{M}+\text{Na}]^+$ .

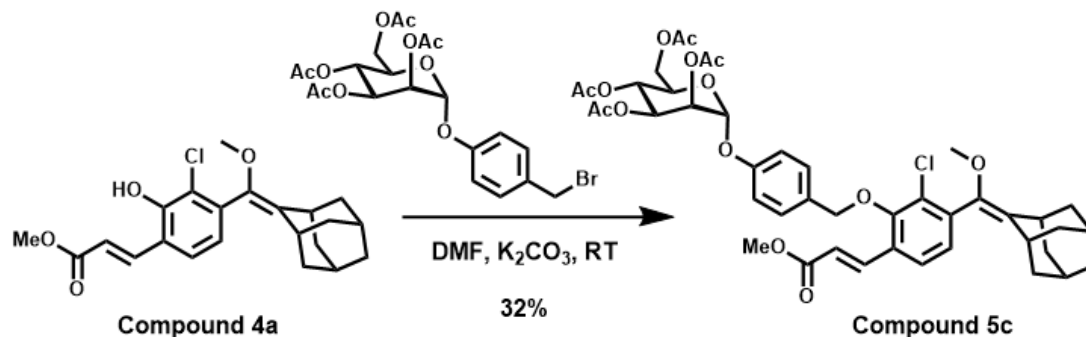

### Compound 5c:

Compound **4a**<sup>[2]</sup> (40mg, 0.1mmol, 1.2eq) is dissolved in dry DMF (2mL) followed by the addition of anhydrous  $K_2CO_3$  (28mg, 0.2mmol, 2eq). The reaction is stirred for 5 min followed by the addition of compound **VII** (45mg, 0.086mmol, 1eq). Upon completion as indicated by TLC, the reaction is quenched with sat.  $NH_4Cl$  solution and sat.  $Na_2S_2O_3$ , extracted three times with EtOAc. The organic layers are combined, washed with sat. NaCl solution and dried over anhydrous  $Na_2SO_4$ . The solvent was evaporated under reduced pressure, purification of the crude product by column chromatography (30% EtOAc in Hex) afforded compound **5c** (26mg, 32%) as a white solid.

<sup>1</sup>H-NMR (400MHz,  $CDCl_3$ ):  $\delta$ (ppm) = 7.90 (d,  $J$  = 16.2 Hz, 1H), 7.42 (d,  $J$  = 8.3 Hz, 3H), 7.08 (dd,  $J$  = 10.5, 8.3 Hz, 3H), 6.43 (d,  $J$  = 16.2 Hz, 1H), 5.56 (dd,  $J$  = 10.0, 3.5 Hz, 1H), 5.53 (d,  $J$  = 1.7 Hz, 1H), 5.45 (dd,  $J$  = 3.5, 1.8 Hz, 1H), 5.37 (t,  $J$  = 10.1 Hz, 1H), 4.94 (d,  $J$  = 4.8 Hz, 2H), 4.29 (dd,  $J$  = 12.4, 5.3 Hz, 1H), 4.13 – 4.03 (m, 2H), 3.80 (s, 3H), 3.32 (s, 3H), 3.27 (s, 1H), 2.20 (s, 3H), 2.05 (s, 3H), 2.04 (s, 3H), 2.03 (s, 3H), 1.96 – 1.65 (m, 13H).

<sup>13</sup>C-NMR (101MHz,  $CDCl_3$ ):  $\delta$ (ppm) = 170.7, 170.1, 169.9, 167.2, 155.9, 153.7, 139.5, 139.0, 138.3, 132.6, 130.8, 130.6, 129.9, 129.8, 127.9, 125.2, 120.0, 116.6, 95.9, 75.7, 69.5, 69.3, 69.0, 66.0, 62.2, 57.4, 51.9, 39.3, 39.1, 38.7, 37.2, 33.1, 29.8, 28.5, 28.3, 21.0, 20.8.

MS (ES<sup>+</sup>): m/z calc for  $C_{43}H_{49}ClO_{14}$ : 824.3; found: 847.9  $[M+Na]^+$ .

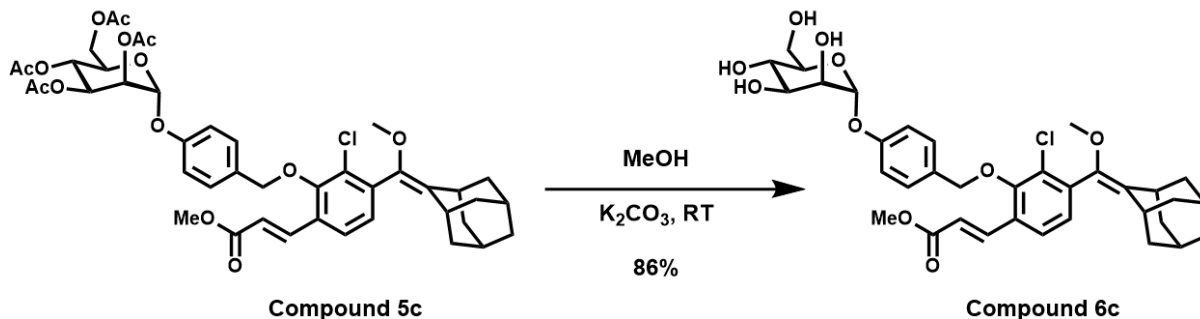

### Compound 6c:

Compound **5c** (26mg, 0.032mmol, 1.2eq) was dissolved in MeOH (2mL) followed by the addition of few grains of anhydrous  $K_2CO_3$ . The reaction is monitored by RP-HPLC (50-100% ACN gradient) – elution times: compound **5c**: 21.5min, compound **6c**: 14.3min. Upon completion, the reaction is quenched by sat.  $NH_4Cl$  solution and extracted 3 times with EtOAc. The organic extracts are combined, washed with sat. NaCl solution and dried over anhydrous  $Na_2SO_4$ . The solvent was evaporated under reduced pressure to yield compound **6c** (18mg, 86%) as a white solid. The crude product was used without further purification.

$^1H$ -NMR (400MHz,  $CDCl_3$ ): 7.84 (d,  $J = 16.2$  Hz, 1H), 7.39 (d,  $J = 8.0$  Hz, 1H), 7.35 (d,  $J = 8.7$  Hz, 2H), 7.05 (dd,  $J = 8.3, 3.0$  Hz, 3H), 6.37 (d,  $J = 16.2$  Hz, 1H), 5.63 (s, 1H), 4.91 (d,  $J = 2.7$  Hz, 2H), 4.25 – 4.15 (m, 3H), 4.00 (d,  $J = 11.5$  Hz, 1H), 3.77 (s, 3H), 3.75 (s, 1H), 3.69 – 3.65 (m, 1H), 3.30 (s, 3H), 3.26 (s, 1H), 2.06 (s, 1H), 1.93 – 1.66 (m, 12H).

$^{13}C$ -NMR (101MHz,  $CDCl_3$ ):  $\delta$ (ppm) = 167.4, 156.4, 153.7, 139.5, 139.1, 138.3, 132.5, 130.8, 130.1, 130.0, 129.9, 127.9, 125.1, 119.7, 116.5, 98.3, 75.9, 73.1, 71.6, 71.0, 66.3, 61.0, 60.6, 57.4, 52.0, 39.2, 38.8, 37.2, 33.1, 32.1, 31.8, 29.8, 28.5, 22.8.

MS (ES<sup>+</sup>): m/z calc for  $C_{35}H_{41}ClO_{10}$ : 656.2; found: 679.7 [M+Na]<sup>+</sup>.

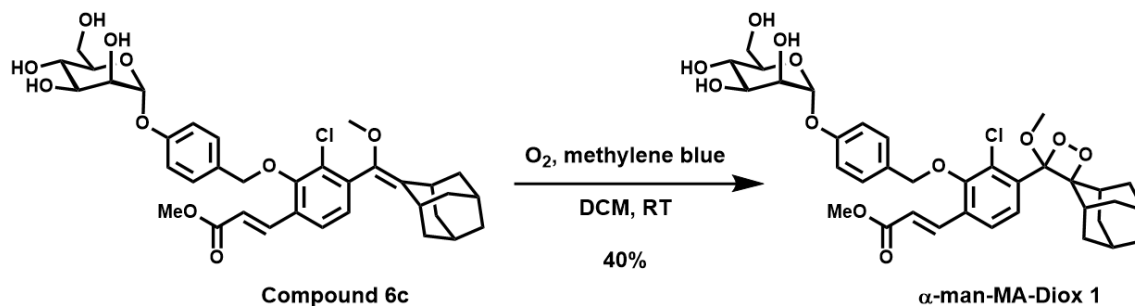

### $\alpha$ -man-MA-Diox 1:

Compound **6c** (18mg, 0.027mmol) was dissolved in DCM (10mL), a catalytic amount of methylene blue (<1 mg) was added to the solution. Oxygen was bubbled through the solution while irradiating with a yellow light. The reaction was monitored by RP-HPLC (50-100% ACN gradient). – elution times: compound **6c**: 14.3min,  $\alpha$ -man-MA-Diox **1**: 12.4min. Upon completion, the solvent was evaporated under reduced pressure at 20°C. The crude product was purified by preparative RP-HPLC. The acetonitrile was evaporated under reduced pressure at 20°C following a freeze drying to afford  $\alpha$ -man-MA-Diox **1** (7.5mg, 40%) as a white solid.

<sup>1</sup>H-NMR (400MHz, MeOD): 7.88 (d,  $J$  = 8.4 Hz, 1H), 7.81 – 7.71 (m, 2H), 7.31 (dd,  $J$  = 8.7, 2.7 Hz, 2H), 7.10 (dd,  $J$  = 8.6, 1.2 Hz, 2H), 6.51 (dd,  $J$  = 16.2, 0.9 Hz, 1H), 5.51 – 5.44 (m, 1H), 4.93 (d,  $J$  = 2.5 Hz, 2H), 4.00 (dd,  $J$  = 3.0, 1.9 Hz, 1H), 3.90 (dd,  $J$  = 9.4, 3.4 Hz, 1H), 3.80 (s, 3H), 3.79 – 3.68 (m, 3H), 3.59 (ddd,  $J$  = 9.8, 4.9, 2.7 Hz, 1H), 3.19 (d,  $J$  = 1.3 Hz, 3H), 2.97 (s, 1H), 2.39 (d,  $J$  = 12.7 Hz, 1H), 1.98 (s, 1H), 1.75 (ddd,  $J$  = 49.4, 26.4, 13.5 Hz, 8H), 1.51 (d,  $J$  = 12.4 Hz, 1H), 1.39 (s, 2H).

<sup>13</sup>C-NMR (101MHz, MeOD):  $\delta$ (ppm) = 168.5, 158.4, 155.4, 139.5, 136.5, 133.3, 132.0, 130.9, 130.0, 126.5, 121.7, 117.7, 112.9, 100.2, 97.2, 93.5, 77.1, 75.4, 72.4, 72.0, 68.3, 62.6, 52.4, 50.0, 37.6, 35.1, 34.9, 33.6, 33.2, 32.9, 32.7, 27.7, 27.3.

MS (ES<sup>+</sup>):  $m/z$  calc for C<sub>35</sub>H<sub>41</sub>ClO<sub>12</sub>: 688.2; found: 801.8 [M+TFA-H]<sup>+</sup>.

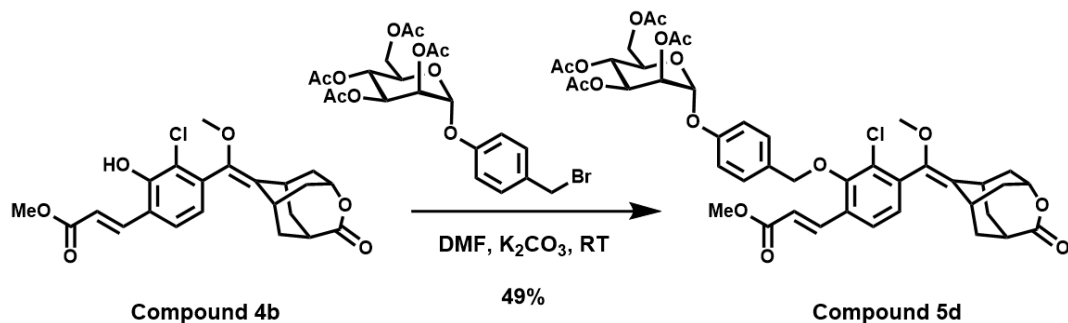

### Compound 5d:

Compound **4b** (18mg, 0.043mmol, 1eq) is dissolved in dry DMF (2mL) followed by the addition of anhydrous  $K_2CO_3$  (28mg, 0.2mmol, 2eq). The reaction is stirred for 5 min followed by the addition of compound **VII** (27mg, 0.052mmol, 1.2eq). Upon completion as indicated by TLC, the reaction is quenched with sat.  $NH_4Cl$  solution and sat.  $Na_2S_2O_3$ , extracted three times with EtOAc. The organic layers are combined, washed with sat. NaCl solution and dried over anhydrous  $Na_2SO_4$ . The solvent was evaporated under reduced pressure, purification of the crude product by column chromatography (50% to 70% EtOAc in Hex) afforded compound **5d** (18mg, 49%) as a white solid.

$^1H$ -NMR (400MHz,  $CDCl_3$ ):  $\delta$ (ppm) = 7.89 (d,  $J$  = 16.2 Hz, 1H), 7.47 (dd,  $J$  = 8.0, 3.0 Hz, 1H), 7.42 (d,  $J$  = 8.6 Hz, 2H), 7.10 (d,  $J$  = 8.6 Hz, 2H), 7.06 (ddd,  $J$  = 8.2, 5.3, 2.9 Hz, 1H), 6.45 (d,  $J$  = 16.2 Hz, 1H), 5.58 – 5.55 (m, 1H), 5.55 – 5.53 (m, 1H), 5.45 (dd,  $J$  = 3.4, 1.8 Hz, 1H), 5.39 (d,  $J$  = 10.1 Hz, 1H), 4.94 (s, 2H), 4.53 (s, 1H), 4.29 (dd,  $J$  = 12.3, 5.1 Hz, 1H), 4.12 – 4.04 (m, 2H), 3.82 (s, 3H), 3.51 – 3.48 (m, 1H), 3.32 (s, 3H), 3.12 (s, 1H), 2.24 (s, 1H), 2.20 (s, 3H), 2.17 – 2.13 (m, 1H), 2.11 – 2.06 (m, 2H), 2.05 (s, 3H), 2.04 (s, 3H), 2.04 (s, 3H), 2.01 – 1.86 (m, 5H).

$^{13}C$ -NMR (101MHz,  $CDCl_3$ ):  $\delta$ (ppm) = 178.8, 170.7, 170.1, 169.9, 167.0, 156.0, 153.9, 141.9, 138.6, 136.7, 130.6, 127.5, 127.4, 125.7, 124.9, 124.2, 123.6, 120.7, 116.7, 116.0, 114.2, 99.8, 95.9, 75.9, 73.4, 73.3, 69.5, 69.4, 69.0, 66.0, 62.2, 60.6, 56.9, 52.0, 41.4, 37.9, 37.5, 37.2, 34.0, 33.0, 32.6, 32.3, 32.1, 31.8, 31.3, 29.8, 29.5, 29.3, 29.1, 27.8, 22.8, 21.0, 20.8, 14.3.

MS (ES<sup>+</sup>): m/z calc for  $C_{43}H_{44}ClO_{16}$ : 854.3; found: 855.9  $[M+H]^+$ .

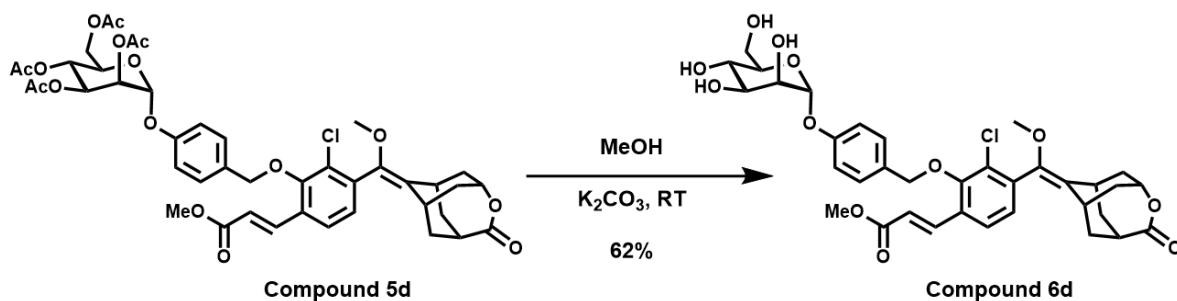

### Compound 6d:

Compound **5d** (18mg, 0.021mmol) was dissolved in MeOH (2mL) followed by the addition of few grains of anhydrous  $K_2CO_3$ . The reaction is monitored by RP-HPLC (50-100% and 30-100% ACN gradient) – elution times: compound **5d**: 12.4min, compound **6d**: 10.5min respectively. Upon completion, the reaction is quenched by sat.  $NH_4Cl$  solution and extracted 3 times with EtOAc. The organic extracts are combined, washed with sat. NaCl solution and dried over anhydrous  $Na_2SO_4$ . The solvent was evaporated under reduced pressure to yield compound **6d** (9mg, 62%) as a white solid. The crude product was used without further purification.

$^1H$ -NMR (400MHz,  $CDCl_3$ ): 7.89 (d,  $J = 16.2$  Hz, 1H), 7.47 (d,  $J = 8.0$  Hz, 1H), 7.34 (d,  $J = 6.7$  Hz, 2H), 7.05 (dt,  $J = 8.6, 4.1$  Hz, 3H), 6.45 (d,  $J = 16.2$  Hz, 1H), 5.62 (s, 1H), 5.03 – 4.97 (m, 1H), 4.91 (d,  $J = 10.7$  Hz, 1H), 4.53 (s, 1H), 4.21 (s, 3H), 4.01 (d,  $J = 10.9$  Hz, 1H), 3.81 (s, 3H), 3.75 (d,  $J = 11.1$  Hz, 1H), 3.66 (s, 1H), 3.48 (s, 1H), 3.32 (s, 3H), 3.14 – 3.08 (m, 1H), 2.25 – 2.21 (m, 1H), 2.19 (s, 1H), 2.12 – 2.07 (m, 2H), 2.02 – 1.85 (m, 5H).

$^{13}C$ -NMR (101MHz,  $CDCl_3$ ):  $\delta$ (ppm) = 179.3, 167.1, 156.6, 153.7, 141.9, 138.7, 136.7, 130.9, 130.7, 129.9, 129.7, 127.3, 125.7, 124.8, 124.6, 120.5, 116.5, 98.3, 76.2, 73.6, 73.5, 73.2, 71.5, 70.9, 66.3, 61.0, 56.9, 52.1, 41.3, 37.8, 37.5, 37.2, 32.9, 32.5, 32.3, 32.1, 31.2, 29.8, 29.5, 27.8, 22.8, 14.3.

MS (ES<sup>+</sup>): m/z calc for  $C_{35}H_{39}ClO_{12}$ : 686.2; found: 725.7  $[M+K]^+$ .

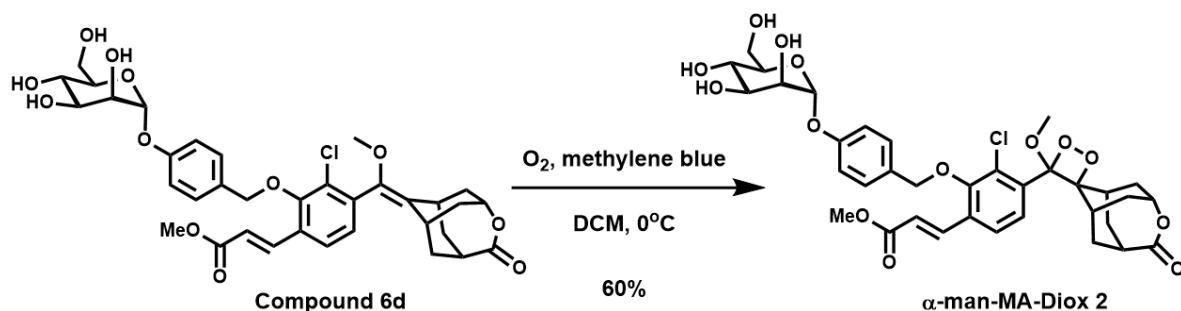

### $\alpha$ -man-MA-Diox 2:

Compound **6d** (18mg, 0.027mmol) was dissolved in DCM (10mL), a catalytic amount of methylene blue (<1 mg) was added to the solution. Oxygen was bubbled through the solution while irradiating with a yellow light. The reaction was monitored by RP-HPLC (30-100% ACN gradient). – elution times: compound **6d**: 10.5min,  **$\alpha$ -man-MA-Diox 2**: 11.2min. Upon completion, the solvent was evaporated under reduced pressure at 20°C. The crude product was purified by preparative RP-HPLC. The acetonitrile was evaporated under reduced pressure at 20°C following a freeze drying to afford  **$\alpha$ -man-MA-Diox 2** (5.6mg, 60%) as a white solid.

<sup>1</sup>H-NMR (400MHz, MeOD): 7.90 (d, *J* = 8.4 Hz, 1H), 7.82 – 7.75 (m, 2H), 7.31 (d, *J* = 8.6 Hz, 2H), 7.09 (d, *J* = 8.6 Hz, 2H), 6.55 (dd, *J* = 16.2, 2.6 Hz, 1H), 5.47 (d, *J* = 1.9 Hz, 1H), 4.95 (s, 2H), 4.36 – 4.31 (m, 1H), 4.00 (dd, *J* = 3.4, 1.8 Hz, 1H), 3.89 (dt, *J* = 9.4, 2.6 Hz, 1H), 3.80 (s, 3H), 3.78 – 3.67 (m, 3H), 3.57 (dq, *J* = 6.8, 2.4, 1.9 Hz, 1H), 3.20 (dd, *J* = 3.3, 1.2 Hz, 4H), 2.83 – 2.79 (m, 1H), 2.23 – 2.14 (m, 2H), 2.10 (d, *J* = 16.1 Hz, 1H), 2.02 – 1.40 (m, 6H).

<sup>13</sup>C-NMR (101MHz, MeOD):  $\delta$ (ppm) = 179.1, 167.0, 157.1, 137.9, 134.2, 132.5, 130.7, 129.4, 128.4, 127.4, 125.7, 120.8, 116.3, 98.8, 93.1, 76.0, 74.0, 72.1, 71.4, 71.0, 70.6, 66.9, 61.3, 51.0, 48.8, 39.4, 38.7, 33.3, 32.2, 32.1, 30.9, 30.4, 30.3, 30.2, 27.9, 26.6, 25.6, 25.2.

MS (ES<sup>+</sup>): *m/z* calc for C<sub>35</sub>H<sub>41</sub>ClO<sub>12</sub>: 718.2; found: 831.8 [M+TFA-H]<sup>+</sup>.

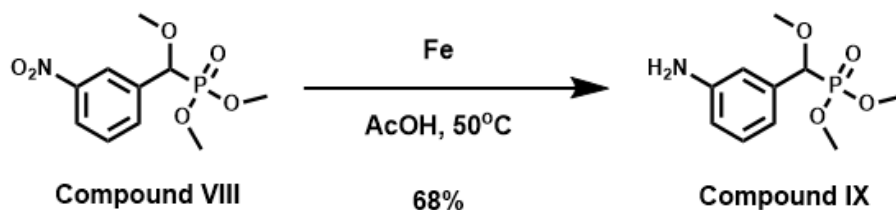

### Compound IX:

Compound VIII<sup>[5]</sup> (500mg, 1.8mmol, 1eq) was dissolved in AcOH (4mL), followed by addition of iron powder (500mg, 9.1mmol, 5eq). The reaction was heated to 50°C using an oil bath and monitored by TLC, the reaction turns into a grey thick suspension. After completion, the reaction was cooled to RT, quenched with 1M NaOH and diluted with CHCl<sub>3</sub>, a brown precipitate forms. The mixture was filtered through celite and extracted with CHCl<sub>3</sub>. The combined organic layers are washed with sat. NaCl solution and dried over anhydrous Na<sub>2</sub>SO<sub>4</sub>. Evaporation of the solvent afforded compound IX (305mg, 68%) as an off-white solid. The crude product was used without further purification.

<sup>1</sup>H-NMR (400MHz, C<sub>6</sub>D<sub>6</sub>): δ(ppm) = 6.99 (t, *J* = 7.7 Hz, 1H), 6.86 (d, *J* = 1.8 Hz, 1H), 6.81 (d, *J* = 7.2 Hz, 1H), 6.28 (d, *J* = 7.9 Hz, 1H), 4.35 (d, *J* = 15.4 Hz, 1H), 3.45 (d, *J* = 10.5 Hz, 3H), 3.31 (d, *J* = 10.4 Hz, 3H), 3.06 (s, 3H).

<sup>13</sup>C-NMR (101MHz, C<sub>6</sub>D<sub>6</sub>): δ(ppm) = 147.5, 135.9, 129.1, 118.1, 118.0, 114.9, 114.9, 114.7, 114.7, 81.7, 80.0, 57.9, 57.8, 53.1, 53.1, 52.8, 52.7.

<sup>31</sup>P-NMR (162MHz, C<sub>6</sub>D<sub>6</sub>): δ(ppm) = 21.7.

MS (ES<sup>+</sup>): *m/z* calc for C<sub>10</sub>H<sub>16</sub>NO<sub>4</sub>P: 245.1; found: 268.2 [M+Na]<sup>+</sup>.

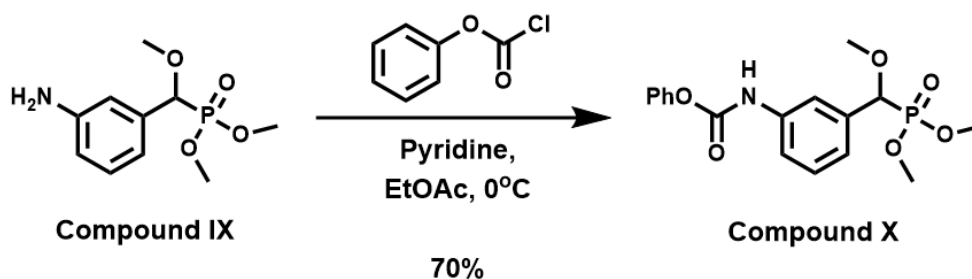

### Compound X:

Compound IX (305mg, 1.24mmol, 1eq) was dissolved in EtOAc (5mL), followed by addition of pyridine (0.2mL, 2.48mmol, 2eq). The reaction was cooled to 0°C using an ice bath, phenyl chloroformate (0.234mL, 1.86mmol, 1.5eq) was slowly added to the solution, a white

precipitate forms. The reaction was quenched with 1M HCl and extracted with EtOAc. The combined organic layers were washed with sat. NaCl solution and dried over anhydrous Na<sub>2</sub>SO<sub>4</sub>. The crude product was purified on a short silica column to afford compound X (317mg, 70%) as a white solid.

<sup>1</sup>H-NMR (400MHz, CDCl<sub>3</sub>): δ(ppm) = 7.57 – 7.49 (m, 2H), 7.43 – 7.32 (m, 4H), 7.26 – 7.21 (m, 1H), 7.20 – 7.15 (m, 3H), 4.54 (d, *J* = 15.7 Hz, 1H), 3.74 (d, *J* = 10.5 Hz, 3H), 3.69 (d, *J* = 10.5 Hz, 3H), 3.39 (s, 3H).

<sup>13</sup>C-NMR (101MHz, CDCl<sub>3</sub>): δ(ppm) = 151.8, 150.7, 138.1, 135.4, 129.6, 125.9, 123.5, 121.8, 119.2, 118.4, 81.0, 79.4, 59.0, 58.8, 54.1, 54.0, 53.9, 53.8.

<sup>31</sup>P-NMR (162MHz, CDCl<sub>3</sub>): δ(ppm) = 21.0.

MS (ES<sup>+</sup>): *m/z* calc for C<sub>17</sub>H<sub>20</sub>NO<sub>6</sub>P: 365.1; found: 388.4 [M+Na]<sup>+</sup>.

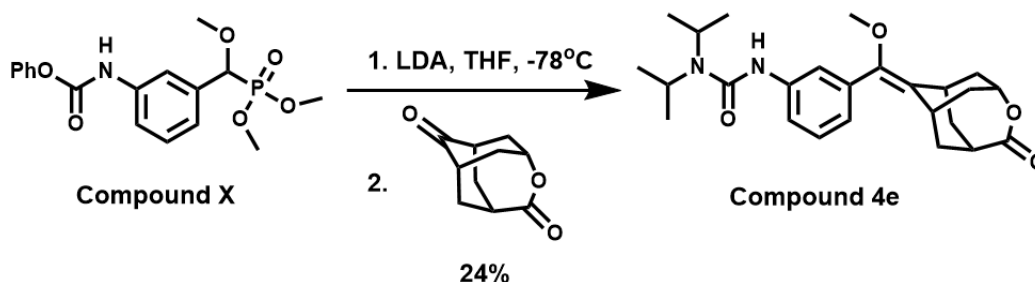

#### Compound 4e:

To a freshly prepared solution of LDA (0.82 mmol, 4eq) in THF (2 mL) under argon a solution of phosphonate X (75mg, 0.20mmol in 1mL, 1eq) in dry THF was added dropwise at -78°C, the solution turns orange. Following 20 minutes of stirring, a solution of compound II (74mg, 0.41mmol in 2mL, 2eq) in dry THF is added all at once into the flask. The reaction is stirred for additional 20 minutes at -78°C and then allowed to reach room temperature. After completion of the reaction indicated by TLC, the reaction is quenched with sat. NH<sub>4</sub>Cl solution and extracted with EtOAc. The combined organic layers were washed with sat. NaCl solution and dried over anhydrous Na<sub>2</sub>SO<sub>4</sub>, the solvent was evaporated under reduced pressure. Purification of the crude product by column chromatography (30% to 40% EtOAc in Hex) afforded the urea derivative, compound 4e (21 mg, 24%) as a yellowish oil.

<sup>1</sup>H-NMR (400MHz, C<sub>6</sub>D<sub>6</sub>): δ(ppm) = 7.91 (s, 1H), 7.25 – 7.21 (m, 1H), 7.11 (d, *J* = 8.2 Hz, 1H), 6.90 (d, *J* = 7.4 Hz, 1H), 6.12 (s, 1H), 4.01 (s, 1H), 3.52 (hept, *J* = 6.9 Hz, 2H), 3.22 (s, 1H), 3.16 – 3.12 (m, 3H), 3.01 (t, *J* = 5.5 Hz, 1H), 2.68 (s, 1H), 1.74 (dd, *J* = 13.6, 5.6 Hz, 2H), 1.63 – 1.61 (m, 2H), 1.57 – 1.51 (m, 2H), 1.33 – 1.28 (m, 2H), 1.00 (d, *J* = 6.8 Hz, 12H).

$^{13}\text{C-NMR}$  (101MHz,  $\text{C}_6\text{D}_6$ ):  $\delta(\text{ppm}) = 177.0, 153.9, 146.1, 140.6, 135.3, 128.7, 124.9, 123.0, 120.5, 118.9, 72.4, 57.1, 45.6, 41.8, 37.7, 37.4, 32.7, 32.5, 30.8, 30.0, 28.2, 21.1.$

**MS (ES+):**  $m/z$  calc for  $\text{C}_{25}\text{H}_{34}\text{N}_2\text{O}_4$ : 426.3; found: 427.6  $[\text{M}+\text{H}]^+$ .

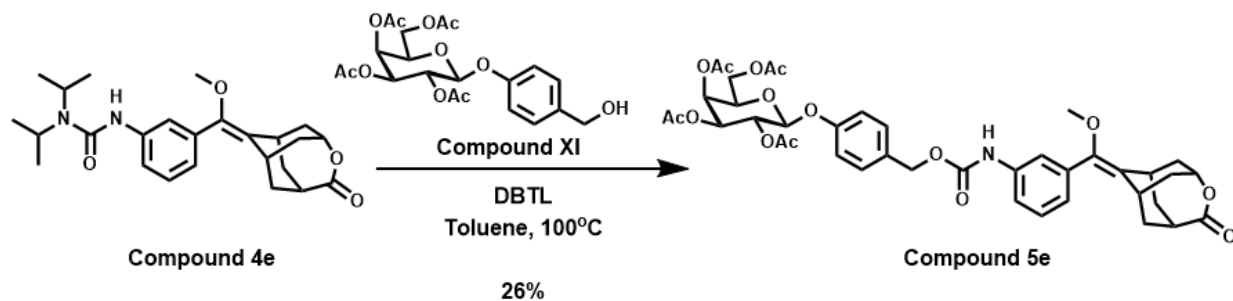

### Compound 5e:

Compound 4e (65mg, 0.15mmol, 1eq) and compound XI<sup>[5]</sup> (54mg, 0.12mmol, 0.8eq) were dissolved in toluene (2mL) and then, DBTL (0.017mL, 0.3mmol, 2eq) was added to the solution. The reaction flask was heated to 100°C using an oil bath and the reaction was monitored by TLC. Upon completion, the solution was cooled to RT and directly loaded on a silica column. Purification of the crude product by column chromatography (40% to 60% EtOAc in Hex) afforded compound 5e (32mg, 26%) as a white solid.

$^1\text{H-NMR}$  (400MHz,  $\text{CDCl}_3$ ):  $\delta(\text{ppm}) = 7.41$  (s, 1H), 7.38 – 7.33 (m, 2H), 7.30 (d,  $J = 7.3$  Hz, 1H), 7.29 – 7.27 (m, 1H), 7.03 – 6.96 (m, 3H), 6.74 (s, 1H), 5.52 – 5.44 (m, 2H), 5.15 (s, 2H), 5.11 (dd,  $J = 10.4, 3.4$  Hz, 1H), 5.04 (d,  $J = 7.9$  Hz, 1H), 4.57 – 4.49 (m, 1H), 4.25 – 4.04 (m, 3H), 3.45 (s, 1H), 3.29 (s, 3H), 3.13 (t,  $J = 5.8$  Hz, 1H), 2.74 (s, 1H), 2.23 – 2.20 (m, 1H), 2.18 (s, 3H), 2.14 – 2.08 (m, 2H), 2.06 (d, 6H), 2.01 (s, 3H), 1.99 – 1.83 (m, 5H).

$^{13}\text{C-NMR}$  (101MHz,  $\text{CDCl}_3$ ):  $\delta(\text{ppm}) = 178.9, 170.5, 170.4, 170.3, 169.5, 157.1, 153.3, 145.9, 138.0, 135.3, 130.2, 129.2, 124.8, 124.4, 119.4, 118.5, 117.2, 99.7, 73.5, 71.2, 70.9, 68.7, 67.0, 66.7, 61.4, 57.7, 41.4, 37.8, 37.5, 33.0, 32.7, 30.7, 29.8, 28.2, 20.9, 20.8, 20.7.$

**MS (ES+):**  $m/z$  calc for  $\text{C}_{40}\text{H}_{45}\text{NO}_{15}$ : 779.3; found: 802.9  $[\text{M}+\text{Na}]^+$ .

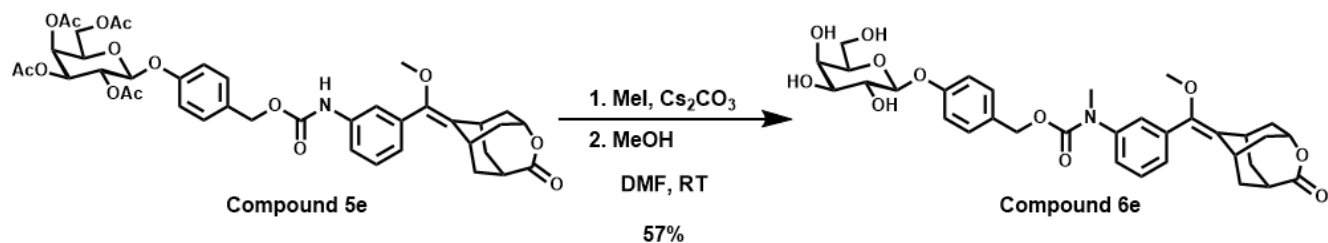

### Compound 6e:

Compound **5e** (35mg, 0.043mmol, 1eq) was dissolved in DMF (1.5mL) and Cs<sub>2</sub>CO<sub>3</sub> (85mg, 0.26mmol, 6eq) was added to the solution. After stirring for 5 minutes, iodomethane (0.027mL, 0.43mmol, 10eq) was added to the suspension. After reaction completion indicated by TLC, the excess iodomethane was evaporated in vacuo and MeOH was added to the suspension and stirred at RT. After reaction completion as indicated by RP-HPLC, the reaction was quenched with sat. NH<sub>4</sub>Cl solution and extracted with EtOAc. The combined organic layers were washed with sat. NaCl solution and dried over anhydrous Na<sub>2</sub>SO<sub>4</sub>. Evaporation of the solvent yielded compound **6e** (10mg, 57% - two steps, white solid) that was used without further purification.

<sup>1</sup>H-NMR (400MHz, CDCl<sub>3</sub>): δ(ppm) = 7.34 (t, *J* = 7.8 Hz, 1H), 7.24 – 7.05 (m, 5H), 6.94 (d, *J* = 8.0 Hz, 2H), 5.02 (s, 2H), 4.81 (d, *J* = 7.0 Hz, 1H), 4.47 (s, 1H), 3.95 (s, 1H), 3.78 (t, *J* = 13.9 Hz, 3H), 3.72 – 3.56 (m, 2H), 3.37 (s, 1H), 3.30 (s, 3H), 3.24 (s, 3H), 3.04 (s, 1H), 2.56 (s, 1H), 2.16 – 2.07 (m, 1H), 2.01 (d, *J* = 15.2 Hz, 2H), 1.84 (s, 3H), 1.72 – 1.59 (m, 2H).

<sup>13</sup>C-NMR (101MHz, CDCl<sub>3</sub>): δ(ppm) = 179.7, 157.3, 155.5, 145.6, 143.3, 134.8, 130.7, 129.7, 129.1, 126.7, 125.0, 116.9, 101.3, 74.7, 73.8, 73.5, 71.2, 68.9, 67.3, 61.4, 57.8, 41.3, 37.9, 37.5, 37.3, 32.5, 32.1, 31.8, 30.5, 29.8, 29.5, 28.1, 22.8.

MS (ES<sup>+</sup>): *m/z* calc for C<sub>33</sub>H<sub>39</sub>NO<sub>11</sub>: 625.3; found: 648.7 [M+Na]<sup>+</sup>.

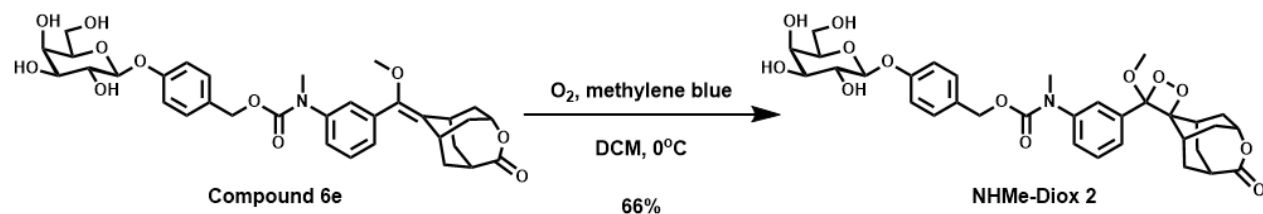

### NHMe-Diox 2

Compound **6e** (10mg, 0.027mmol) was dissolved in DCM (10mL), a catalytic amount of methylene blue (<1mg) was added to the solution. Oxygen was bubbled through the solution while irradiating with a yellow light for a duration of 12min. The reaction was monitored by

RP-HPLC (30-100% ACN gradient) – elution times: compound **6e**: 8.0 min, **NHMe-Diox 2**: 8.8min. Upon completion, the solvent was evaporated under reduced pressure at 20°C. The crude product was purified by preparative RP-HPLC. The acetonitrile was evaporated under reduced pressure at 20°C following a freeze drying to afford **NHMe-Diox 2** (5.6mg, 66%) as a fluffy white solid.

<sup>1</sup>H-NMR (400MHz, MeOD): 7.53 (t, *J* = 7.3 Hz, 1H), 7.40 (d, *J* = 7.1 Hz, 2H), 7.23 (d, *J* = 7.3 Hz, 2H), 7.08 – 7.05 (m, 3H), 5.07 (d, *J* = 7.9 Hz, 2H), 4.30 (s, 1H), 3.89 (d, *J* = 3.3 Hz, 1H), 3.80 – 3.77 (m, 1H), 3.75 (d, *J* = 3.9 Hz, 2H), 3.70 – 3.67 (m, 1H), 3.58 (ddd, *J* = 9.7, 4.4, 2.7 Hz, 2H), 3.32 (s, 3H), 3.19 (s, 3H), 3.14 (s, 1H), 2.78 (t, *J* = 5.8 Hz, 1H), 2.65 (s, 1H), 2.20 (s, 2H), 2.11 – 2.05 (m, 2H), 1.97 – 1.87 (m, 3H), 1.76 (d, *J* = 14.5 Hz, 1H).

<sup>13</sup>C-NMR (101MHz, MeOD): δ(ppm) = 179.5, 179.2, 158.0, 155.9, 143.8, 135.0, 130.2, 129.3, 127.0, 116.5, 111.1, 101.7, 92.5, 75.7, 73.6, 72.1, 71.4, 71.0, 69.0, 67.2, 61.1, 49.2, 39.4, 38.8, 36.8, 33.8, 31.9, 31.0, 30.5, 30.4, 28.7, 26.7, 25.8, 25.2.

(Mixture of diastereomers as indicated by the carbonyl peaks)

**MS (ES+)**: m/z calc for C<sub>33</sub>H<sub>39</sub>NO<sub>13</sub>: 657.2; found: 770.8 [M+TFA-H]

## Experimental Protocols:

### TBS-Kinetics evaluations in DMSO:

Chemiluminescent kinetic profiles were recorded using Spectramax iD3 equipped with an injector cartridge. Solutions of dioxetanes in ACN were diluted to a concentration of 100nM, the injector was washed with ACN and primed with the working solution. 10 $\mu$ L of the working solution was injected to a 96-well white Corning™ plate (each well containing 89 $\mu$ L DMSO, 1 $\mu$ L TBAF (10mM), 10 $\mu$ L probe (10nM)). Measurements were recorded as triplicates at room temperature with 100ms shutter speed of the detector. Luminometer

### Visual demonstration and image analysis:

Light emission was recorded using an iPhone XS with ProCamera software. To a vial containing 1 mL of DMSO was added 20  $\mu$ L of TBAF (1M in THF) and stirred for a few seconds, then 50  $\mu$ L of Diox 1-4 were added, and the light emission was recorded for 2 minutes in total.

Camera settings: 120fps, 1/120 shutter speed, ISO 50.

The videos were analyzed using ImageJ software to extract mean grey area information to plot as normalized intensity plots for the video graphs.

### Data acquisition and processing:

All chemiluminescent data were recorded on Spectramax iD3 luminometer, and the signal is obtained as relative luminescence units vs. time. All data was processed using Origin 2024 software. Kinetic plots are plotted as relative luminescence units (RLU) vs. time. Total light emission (TLE) is obtained by integrating the luminescence intensity over time. The background signal is defined as the signal in the absence of the enzyme, following initial signal burn-off.

Signal-to-noise (S/N) graphs are obtained by plotting the integrated intensity (TLE) divided by the integrated background signal vs. time.

Detector shutter speed (integration time) was set to 100 msec in all measurements.

## **Chemiluminescence measurements of the enzymatic probes with $\beta$ -galactosidase or $\alpha$ -mannosidase:**

Working solutions of MA-diox and NHMe-diox probes were prepared by diluting a 10mM stock solution in ACN/DMSO to a concentration of 100 $\mu$ M using ACN. Enzyme stock solution of 80u/mL was diluted with PBS to a concentration of 20u/mL, 10u/mL, 0.1u/mL or 0.01u/mL. The measurement was conducted using a 96-well white Corning™ plate – to each well was added 80 $\mu$ L of PBS 7.4 and 10 $\mu$ L of probe working solution. The measurement was started and background burn-off was monitored, after reaching a steady state, 10 $\mu$ L of the enzyme solution was added and the measurement was started again (final concentration of probe: 10 $\mu$ M. final concentration of enzyme: 2u/mL, 1u/mL, 0.01u/mL, 0.001u/mL.)

## **Stability assays in PBS pH 7.4**

100 $\mu$ M solution of the probes  $\beta$ -gal-MA-Diox 1 and 2 were prepared in PBS 7.4 with 10% ACN and incubated at 37°C. 50 $\mu$ L of each solution were injected into the HPLC every 24h. Decomposition percentage was determined from integration of the dioxetane peak compared to the decomposition products at 280nm.

## **Biological evaluation of $\beta$ -gal activity in bacteria**

Test strain: *Escherichia coli* ATCC 8739

Culture: Tube with 2mL nutrient broth and 1mM IPTG, inoculated with approx. 100cfu/mL, incubated for 24h at 37°C in dry block heater.

Probes  $\beta$ -gal-MA-Diox 1 and 2 were diluted (1:20) with PBS 7.4 and incubated for 1h at 37°C for background burn-off.

PBS with cell lysis agents were added to transparent polypropylene tubes, 1mL total liquid volume, *E. coli* culture added (10 $\mu$ L) and mixed by vortexing at room temperature (21°C). Working solutions of the probes were added and chemiluminescence measurement was recorded using a bench top luminometer BLT1, NEMIS Technologies AG. Final probe concentration was 20 $\mu$ M, 1% DMSO as co-solvent.

## Biological evaluation of $\alpha$ -man activity in bacteria

Test strain: *Enterococcus thailandicus* NEMIS 502

Culture: Shake flask with 50mL broth (Nutrient Broth + 1mM Methyl-alpha-D-mannopyranoside + 150mM K/Na phosphate buffer pH 7.1 + 0.5g/L MgSO<sub>4</sub> 7·H<sub>2</sub>O), inoculated with approx. 10cfu/mL from BHI broth pre-culture, flask incubated for 24h at 37°C and 150 rpm.

Probes  $\alpha$ -man-MA-Diox 1 and 2 were diluted (1:20) with PBS 7.4 and incubated for 1h at 37°C for background burn-off.

0.79mL culture sample added to transparent polypropylene tube, 10 $\mu$ L of lysis agent added (N,N-Dimethyldodecylammonium N-oxide, final concentration 70 $\mu$ g/mL), 0.2mL dioxetane working solution added, mixed by shaking, assay performed at 37°C, using a bench top luminometer BLT1, NEMIS Technologies AG. Final probe concentration was 20 $\mu$ M, 1% DMSO as co-solvent.

## Supplementary figures

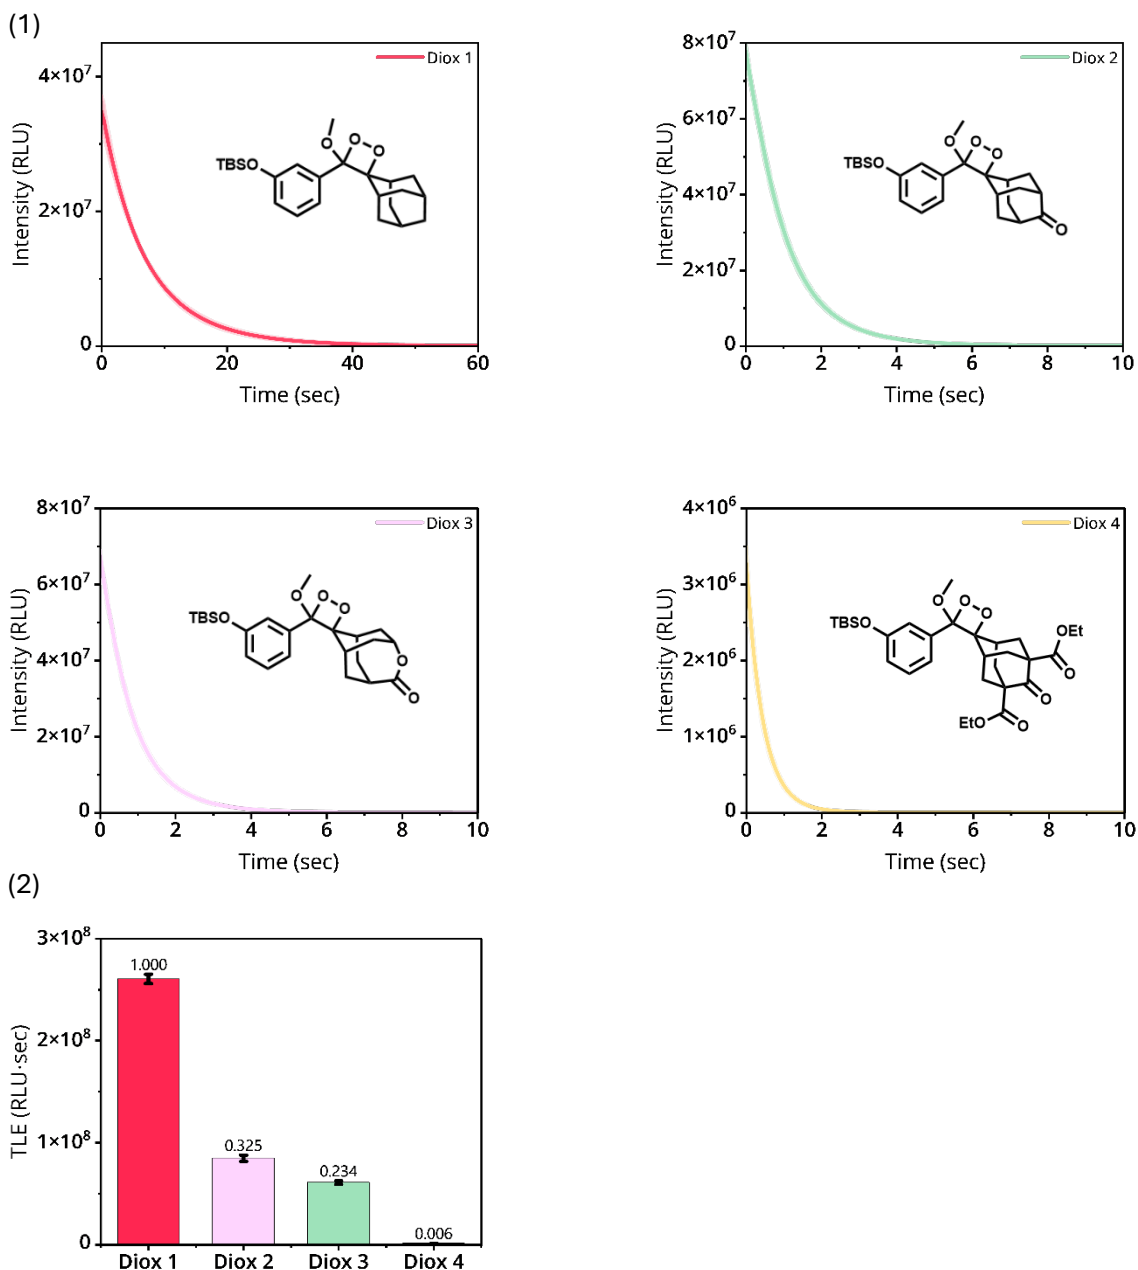

Figure S1: (1) Chemiluminescent activation of Diox 1-4 [10nM] in DMSO in the presence of TBAF [10mM]. (2) Total light emission of Diox 1-4 [10nM] in DMSO in the presence of TBAF [10mM] with relative TLE compared to Diox 1 above bars.

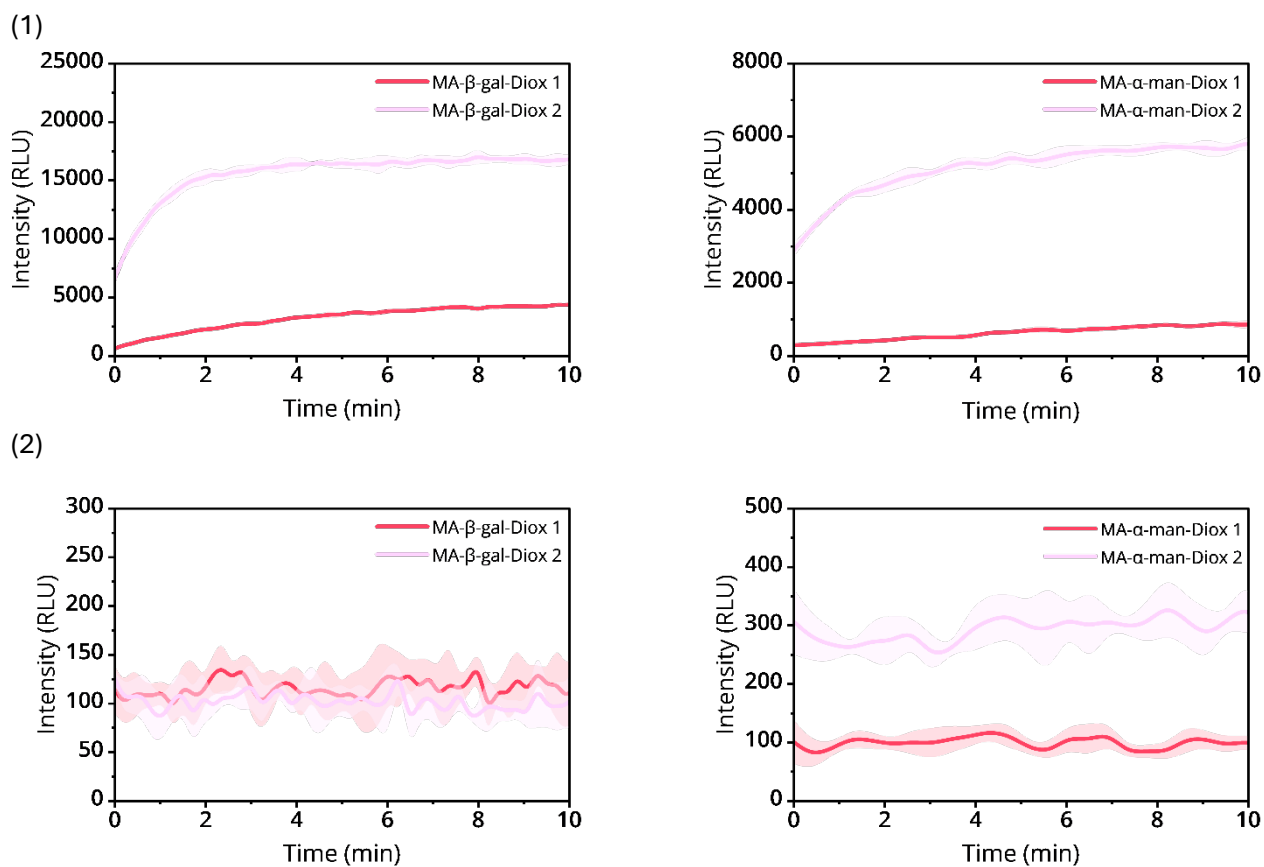

Figure S2: Chemiluminescent activation of (1)  $\beta$ -gal-MA-Diox 1, 2 and  $\alpha$ -man-MA-Diox 1, 2 [10mM] in PBS 7.4 in the presence of  $\beta$ -galactosidase and  $\alpha$ -mannosidase respectively [0.001u/mL]. (2) Kinetic profiles of  $\beta$ -gal-MA-Diox 1, 2 and  $\alpha$ -man-MA-Diox 1, 2 [10mM] in PBS 7.4 in the absence of  $\beta$ -galactosidase and  $\alpha$ -mannosidase.

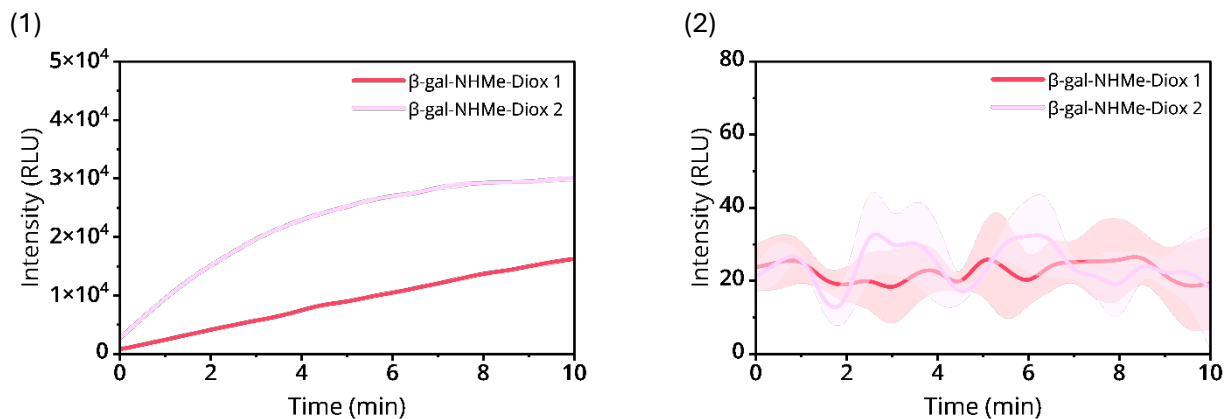

Figure S3: (1) Chemiluminescent activation of  $\beta$ -gal-NHMe-Diox 1 and 2 [10mM] in PBS 7.4 in the presence of  $\beta$ -galactosidase [0.01u/mL]. (2) Background kinetic profiles of  $\beta$ -gal-NHMe-Diox 1 and 2 [10mM] in PBS 7.4 in the absence of  $\beta$ -galactosidase.

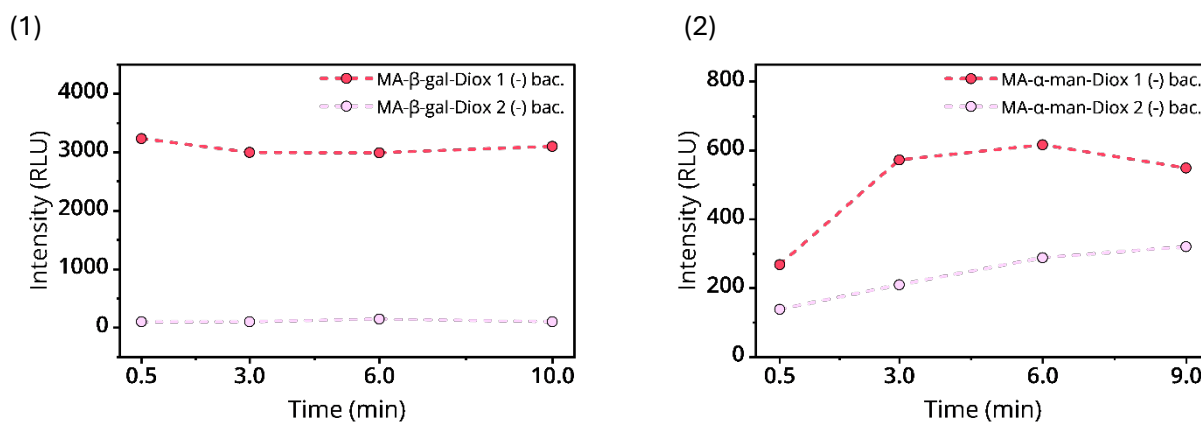

Figure S4: (1) Background kinetic profiles of  $\beta$ -gal-MA-Diox 1, 2 [20mM] in sterile nutrient broth in the absence of *E. coli*. (2) Background kinetic profiles of  $\alpha$ -man-MA-Diox 1, 2 [20mM] in sterile nutrient broth in the absence of *E. thailandicus*.

# NMR, MS and HPLC Spectra of Key Compounds

Diox 2:

<sup>1</sup>H-NMR

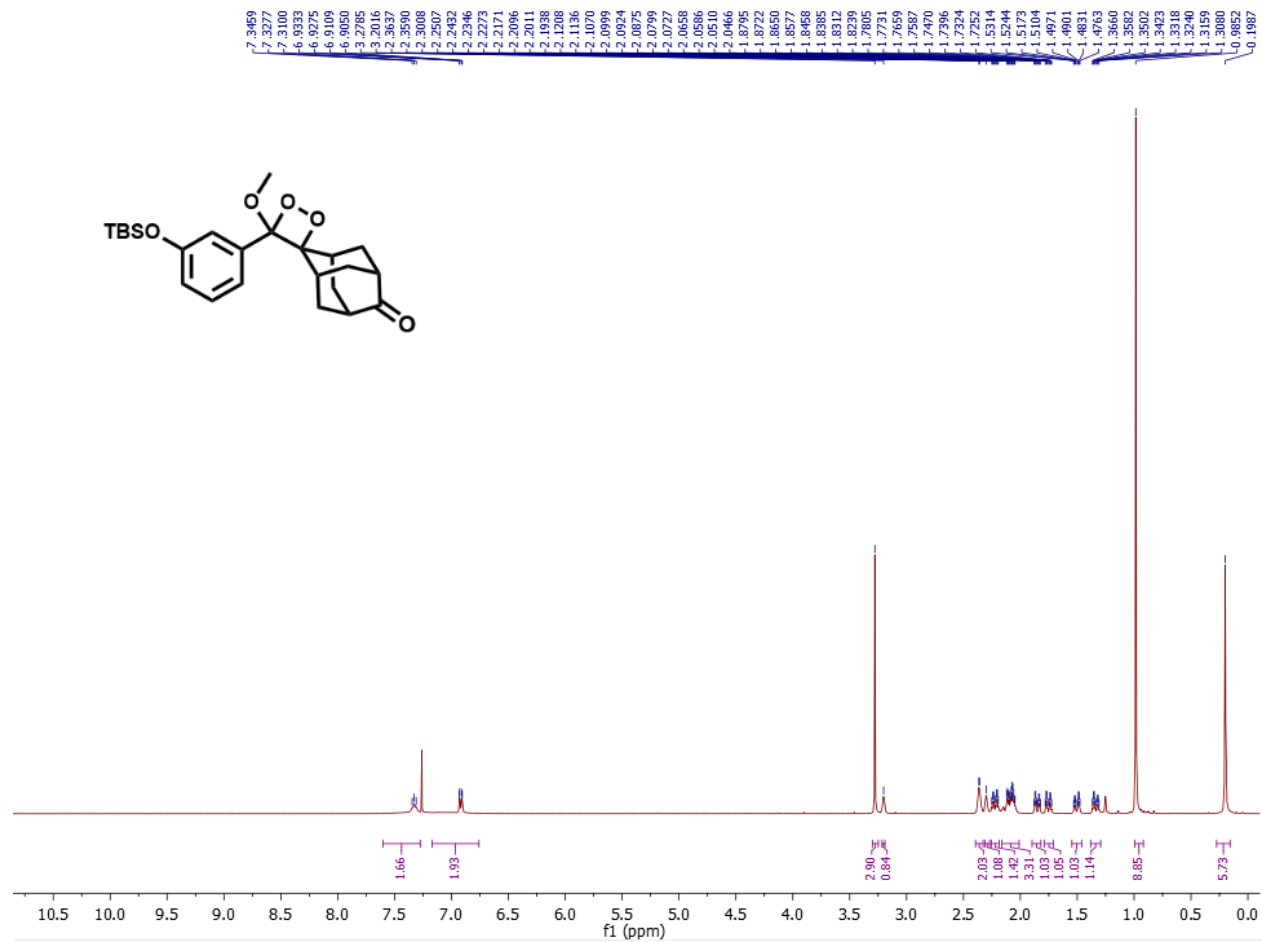

# <sup>13</sup>C-NMR

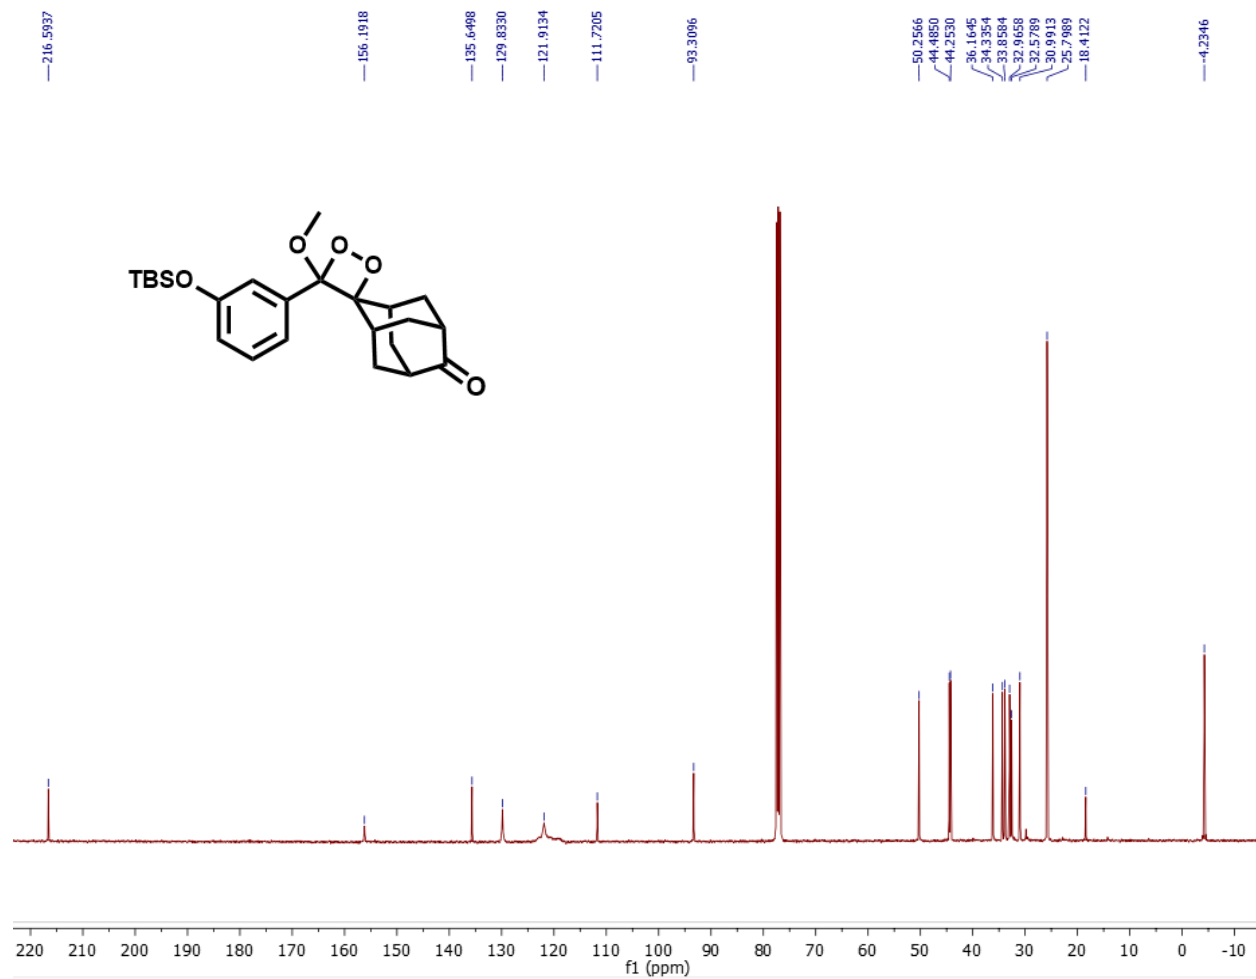

## HPLC (70-100% ACN gradient)

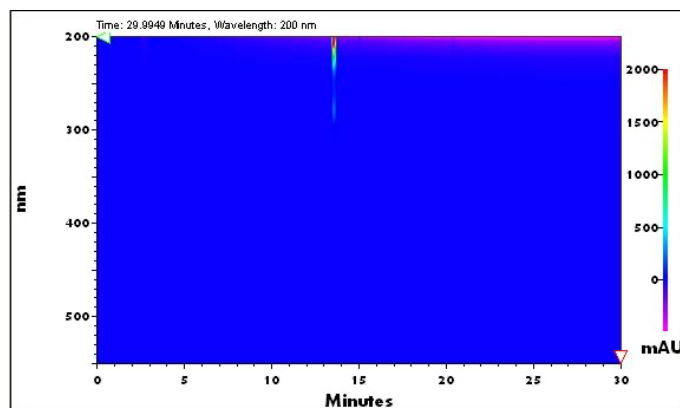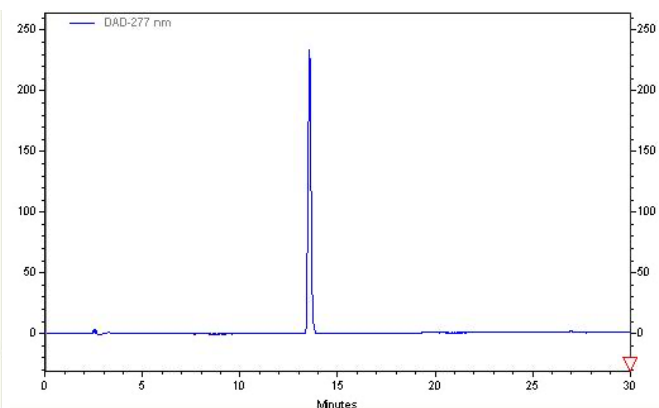

MS

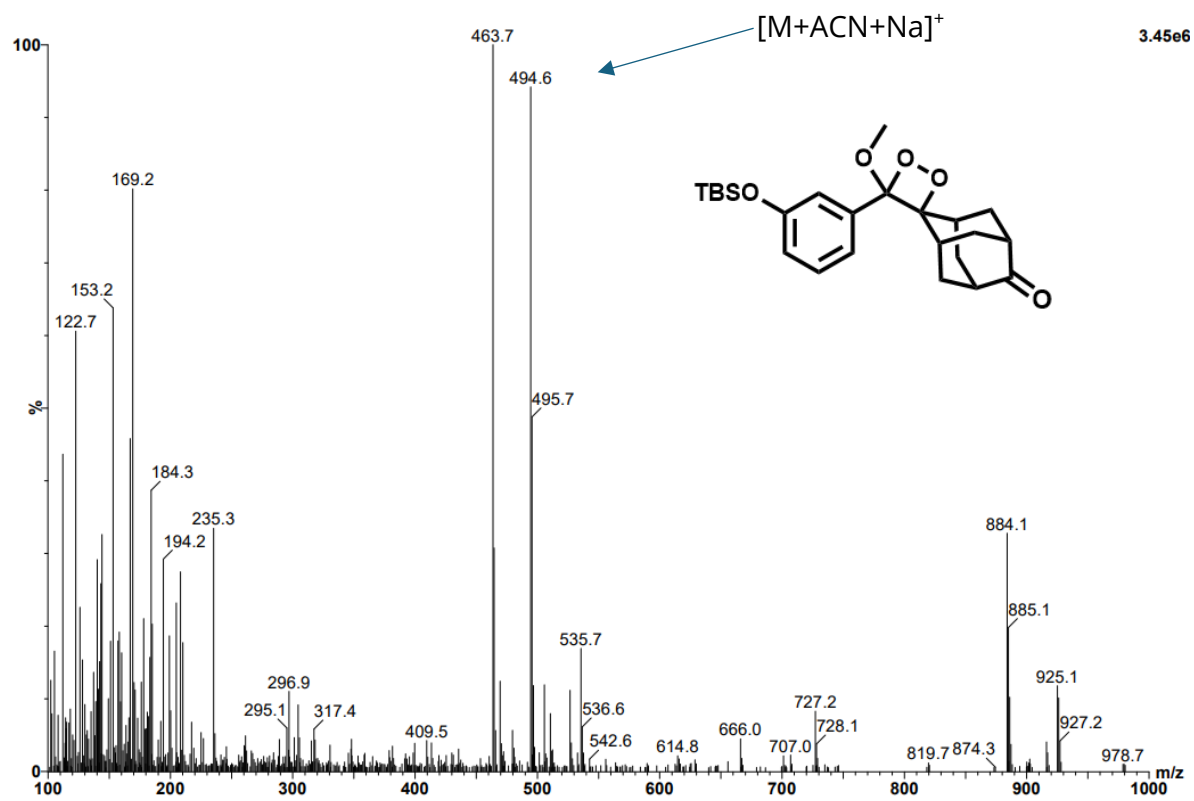

# Diox 3:

## <sup>1</sup>H-NMR

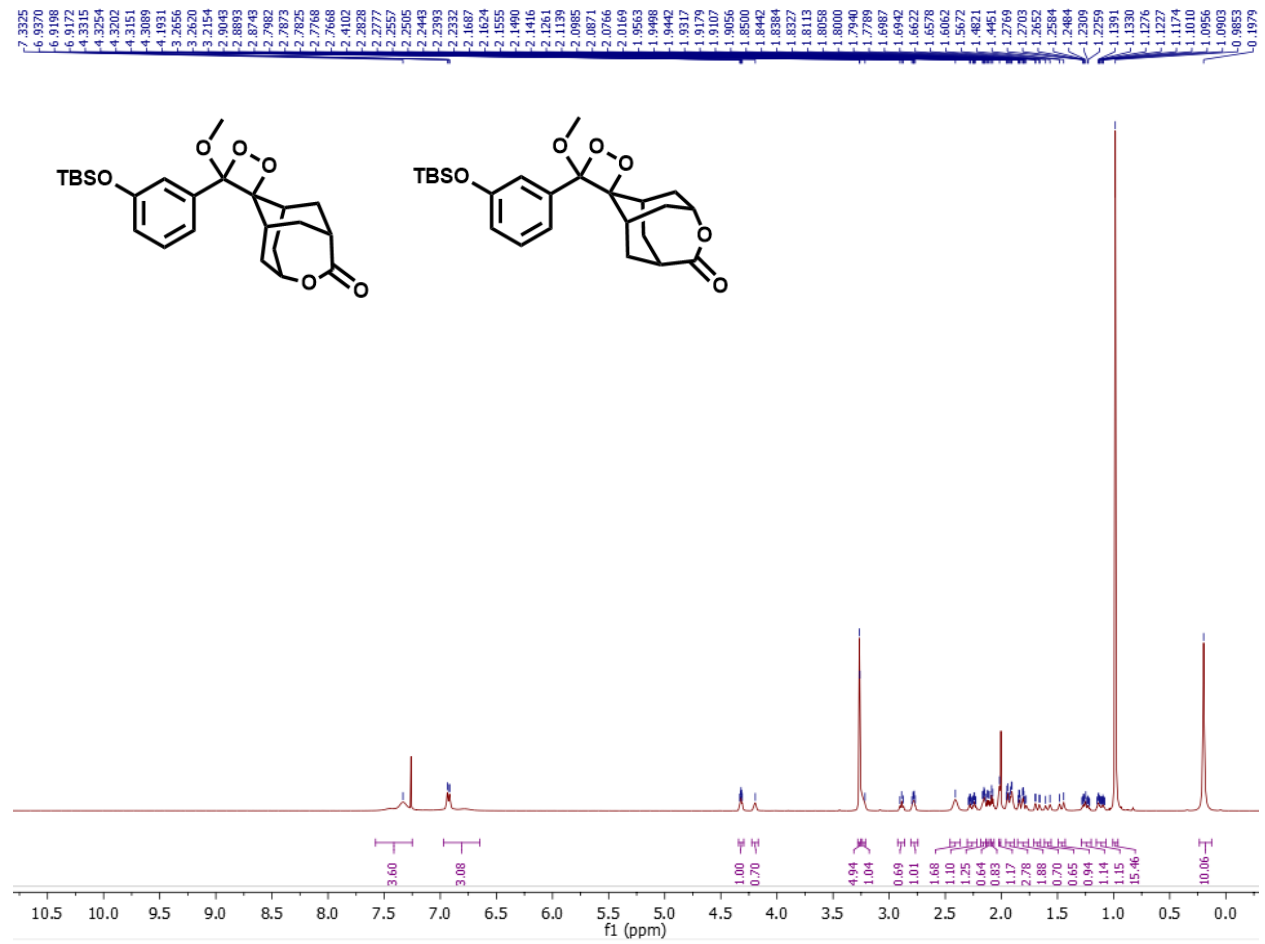

# <sup>13</sup>C-NMR

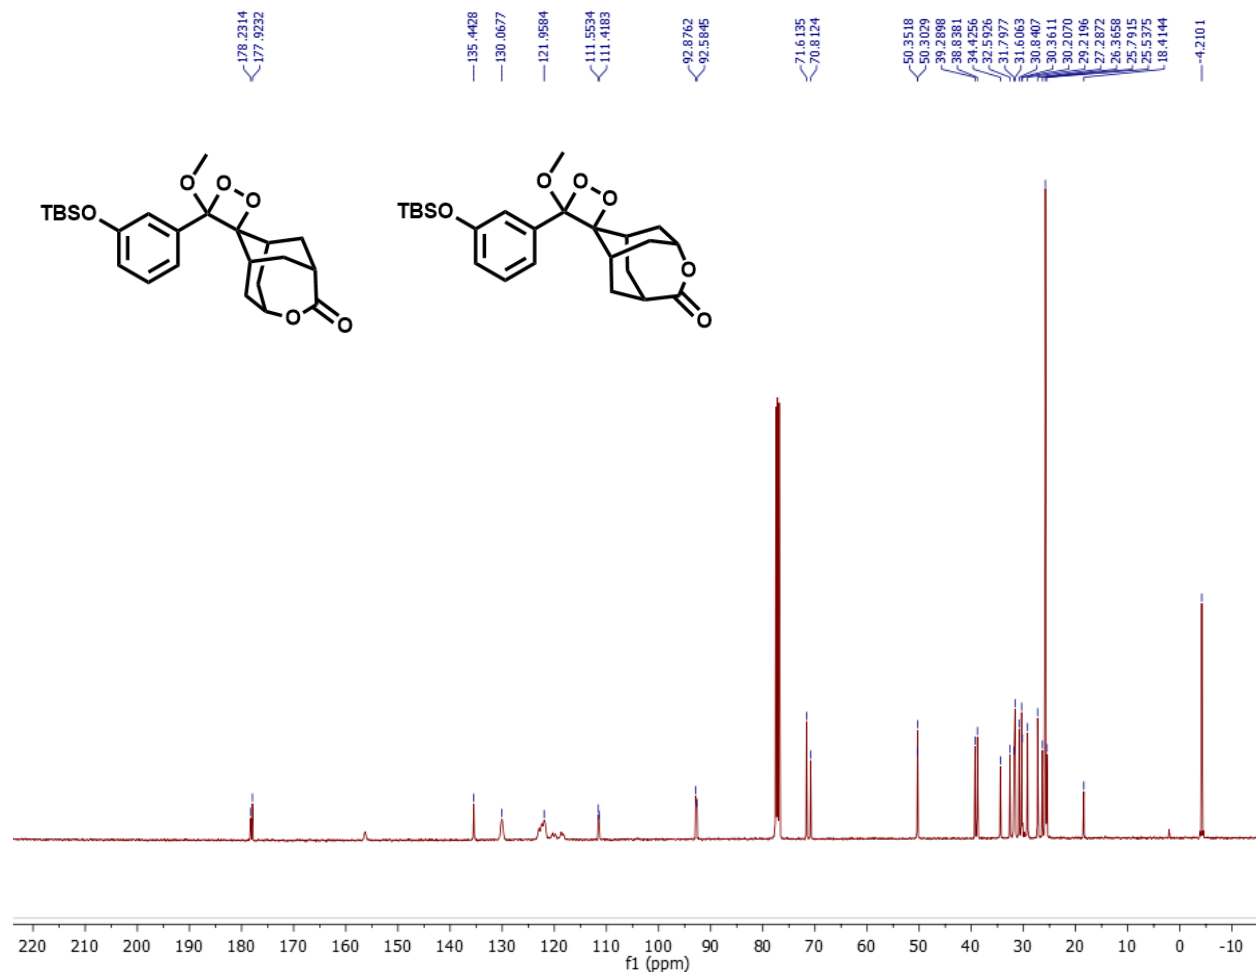

## HPLC (90-100% ACN gradient)

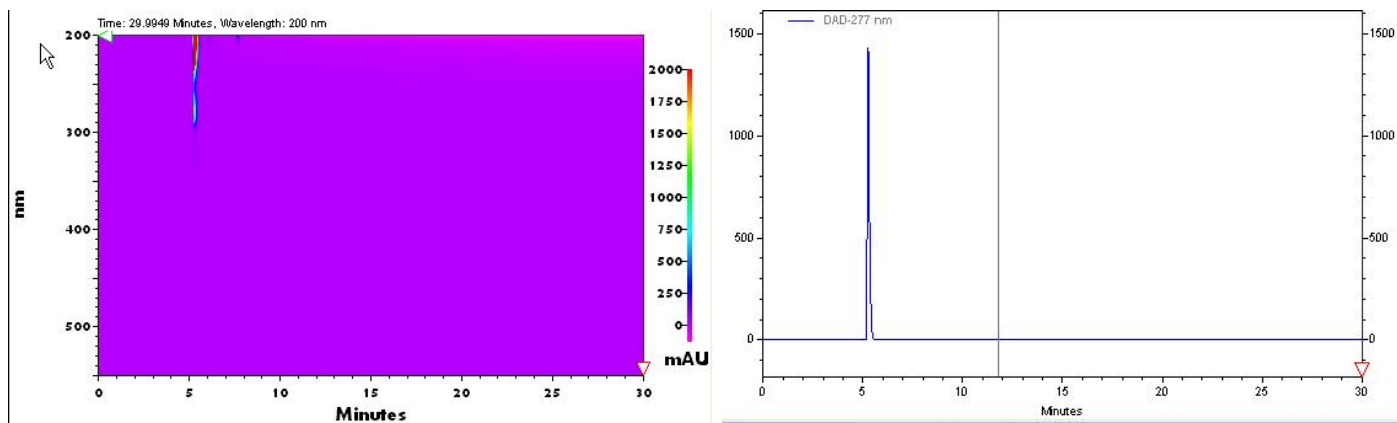

MS

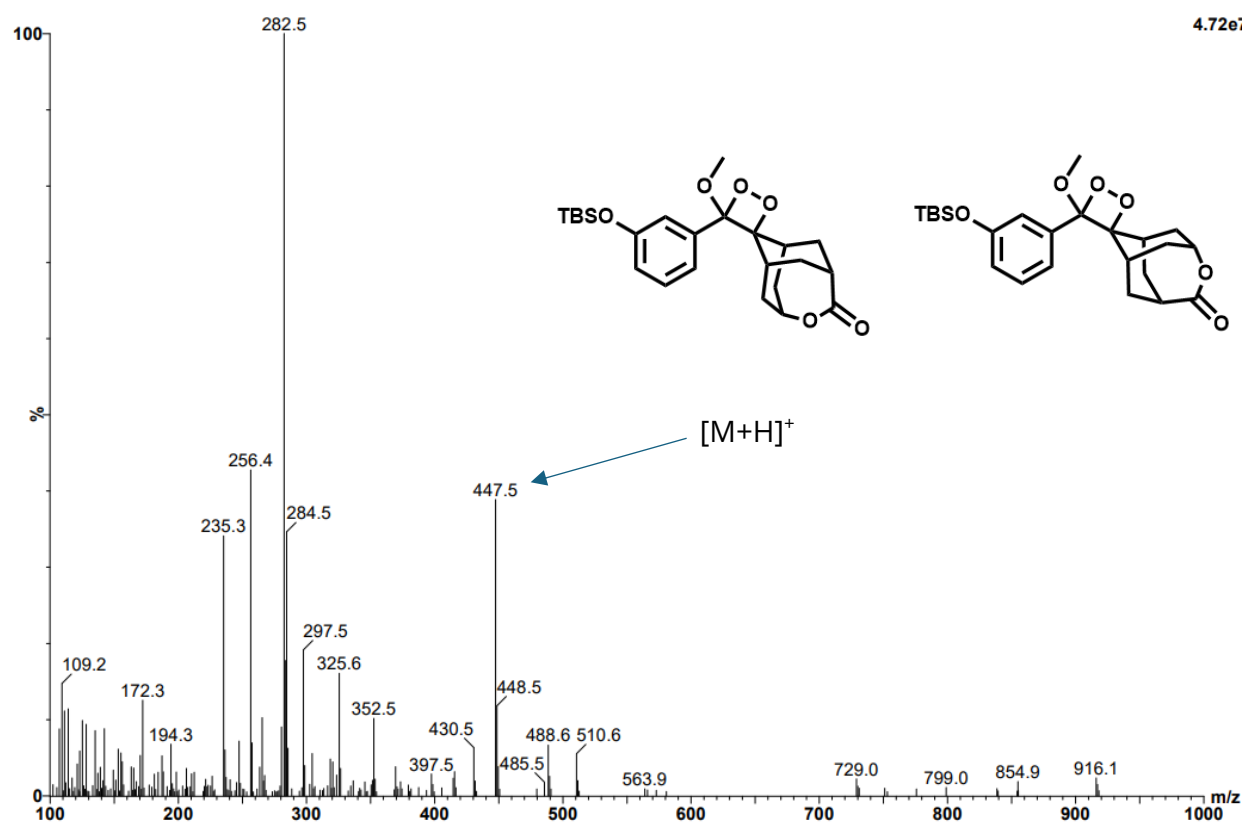

# Diox 4:

## <sup>1</sup>H-NMR

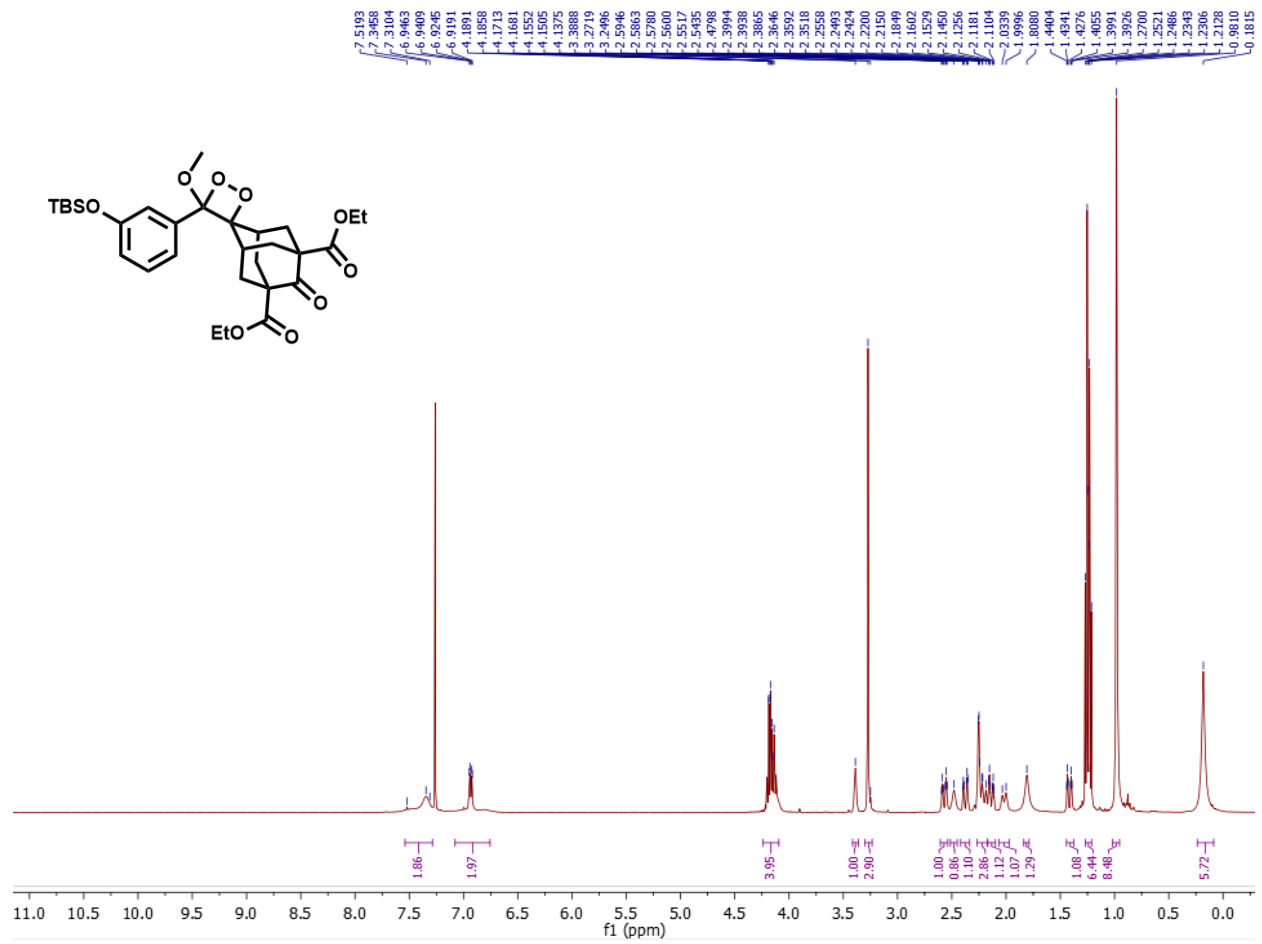

# <sup>13</sup>C-NMR

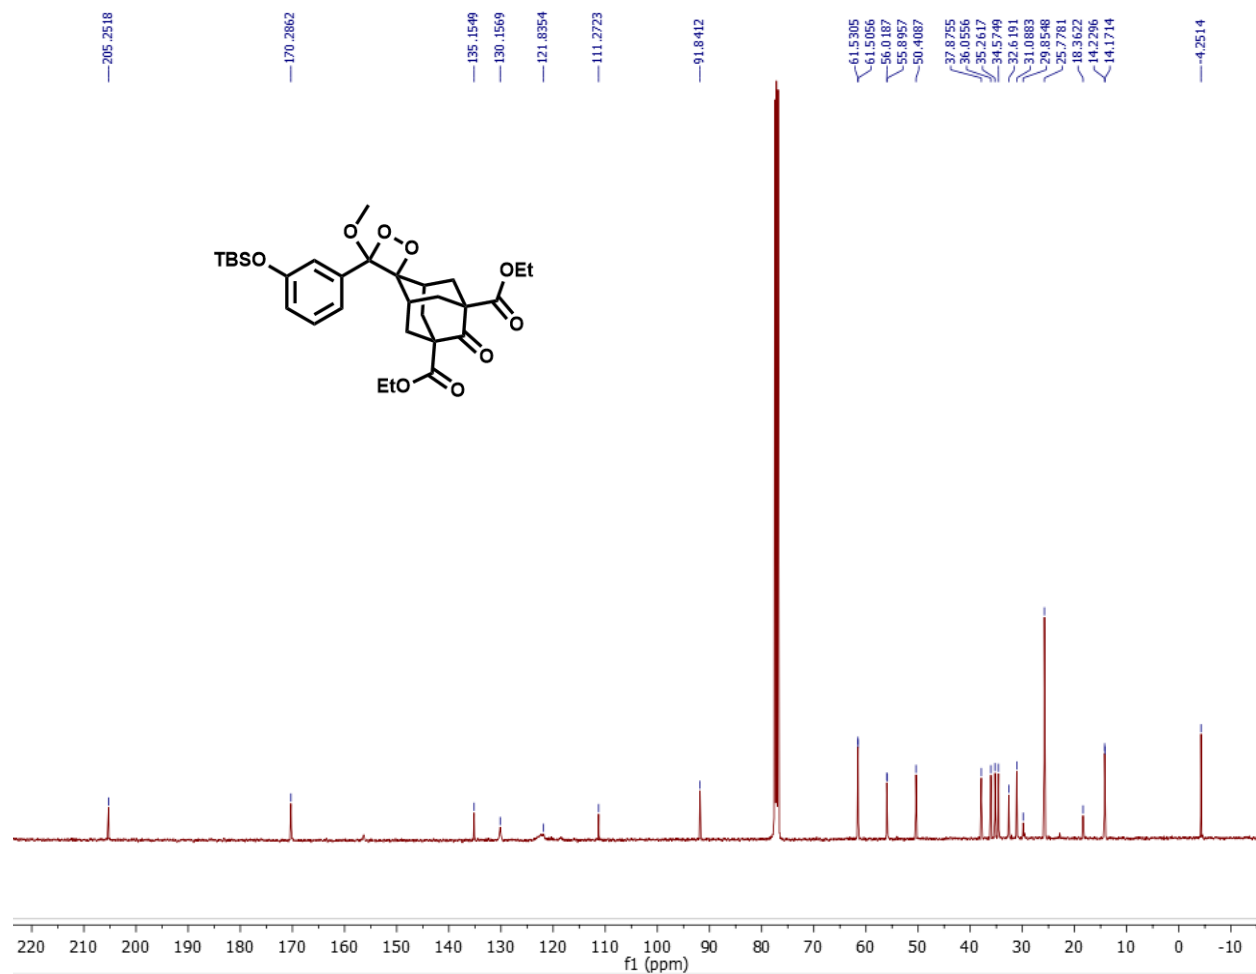

## HPLC (70-100% ACN gradient)

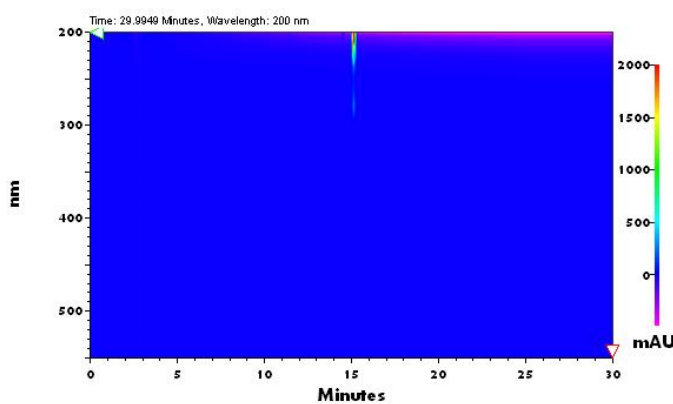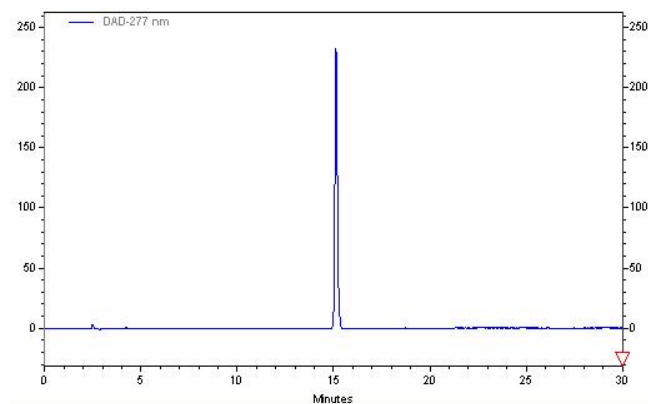

MS

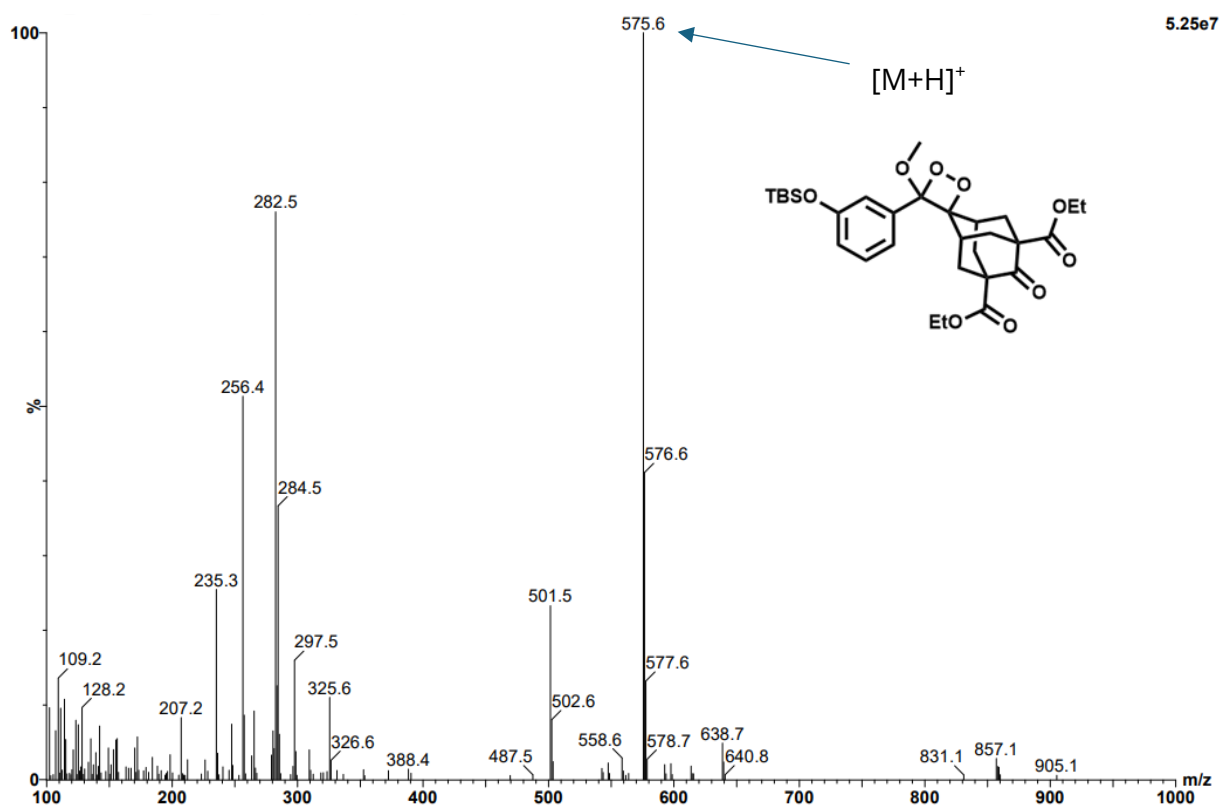

# $\beta$ -gal-MA-Diox 2:

## $^1\text{H-NMR}$

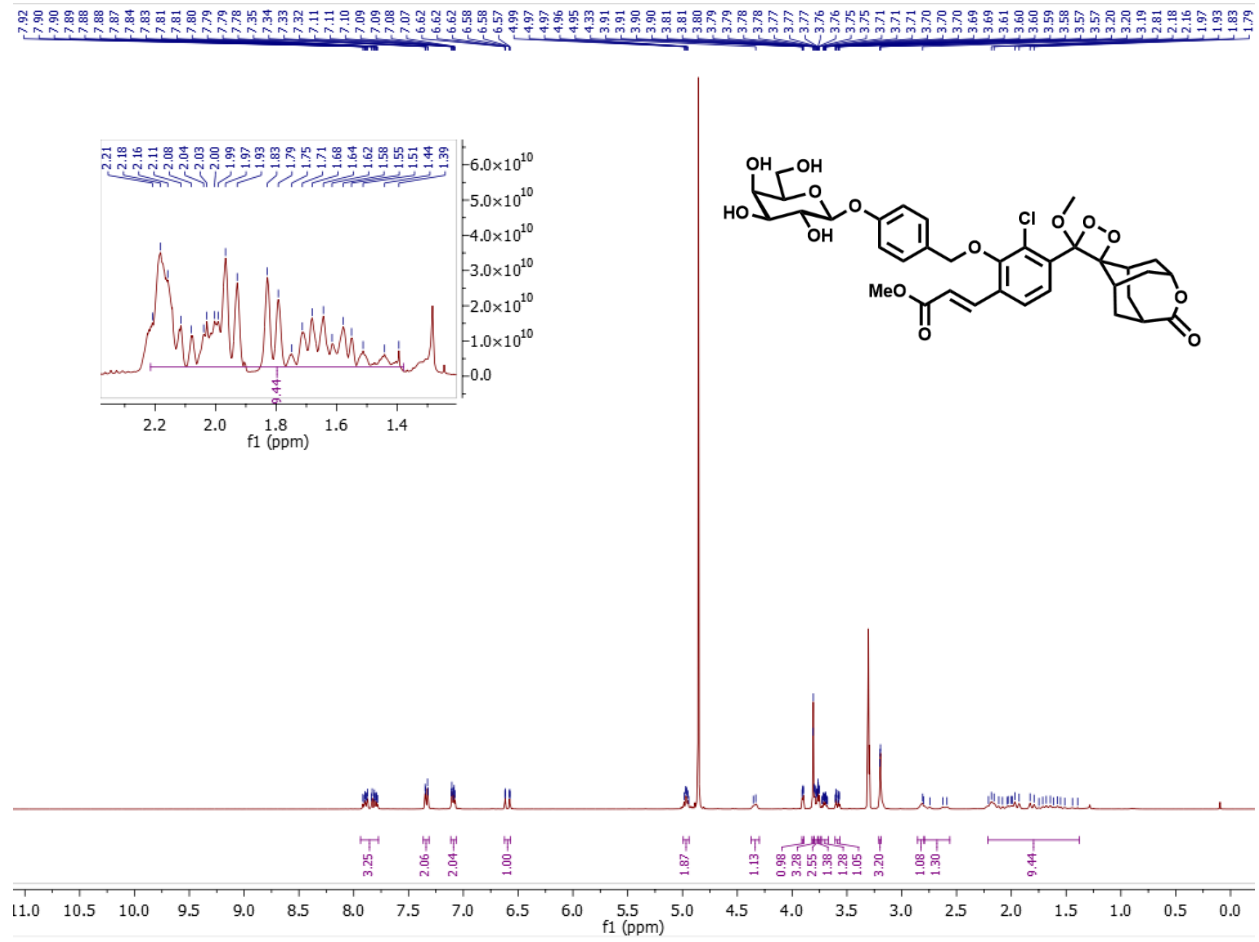

# <sup>13</sup>C-NMR

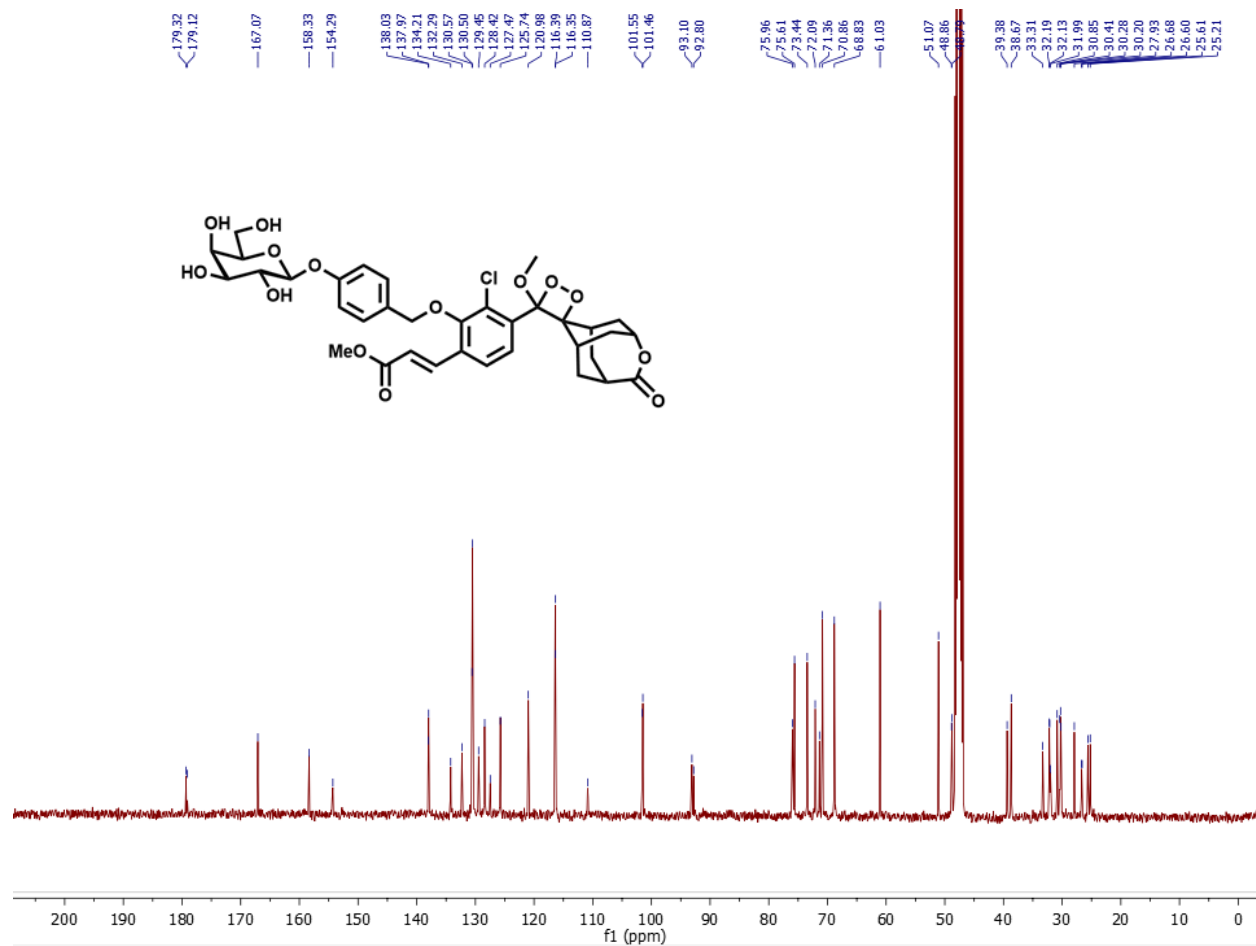

## HPLC (30-100% ACN gradient)

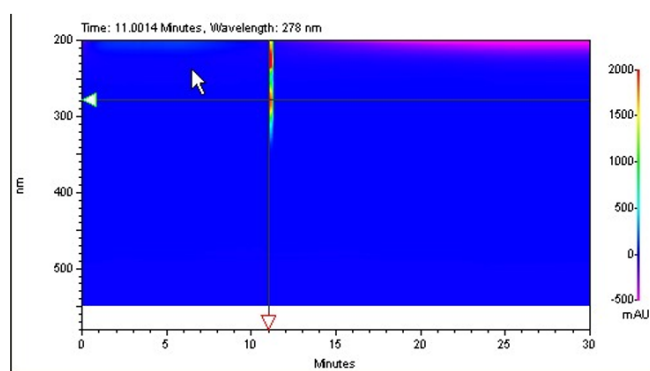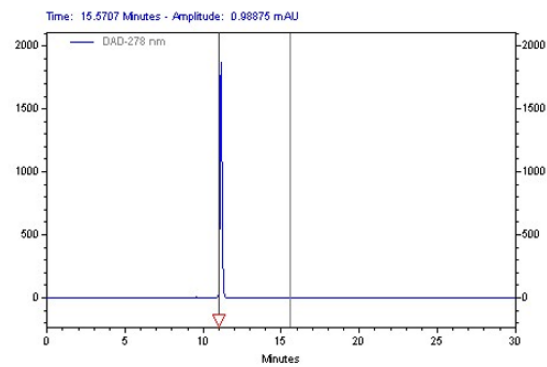

MS

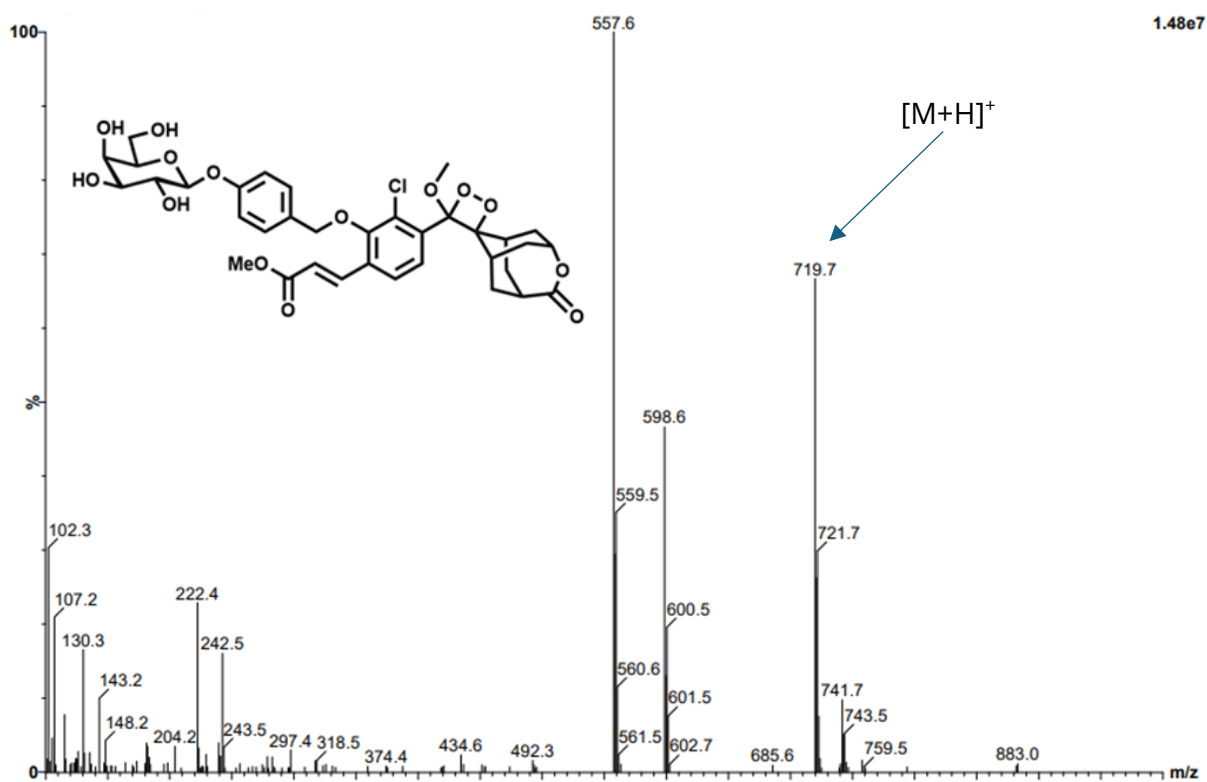

# $\alpha$ -man-MA-Diox 1:

## $^1\text{H-NMR}$

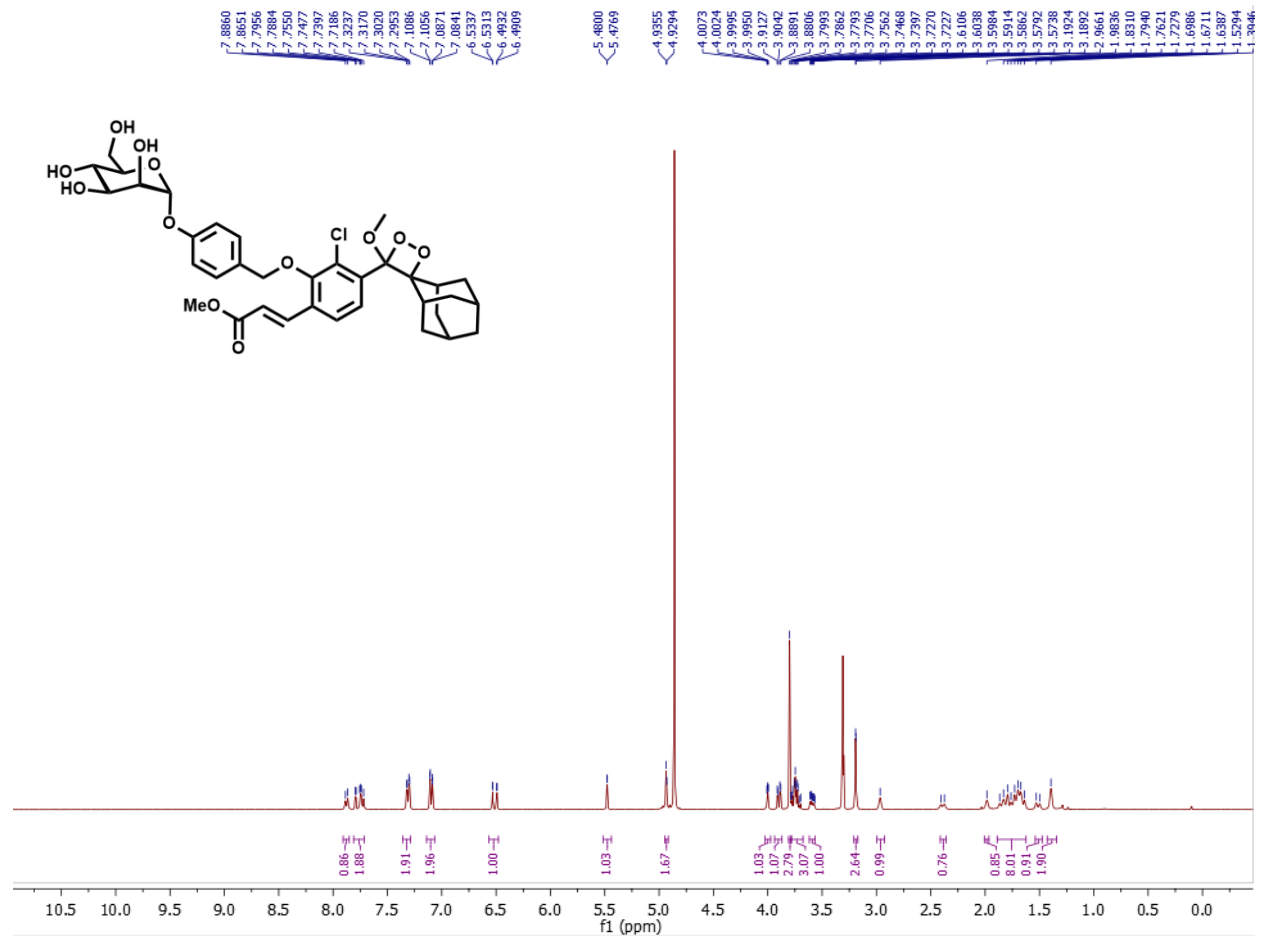

# <sup>13</sup>C-NMR

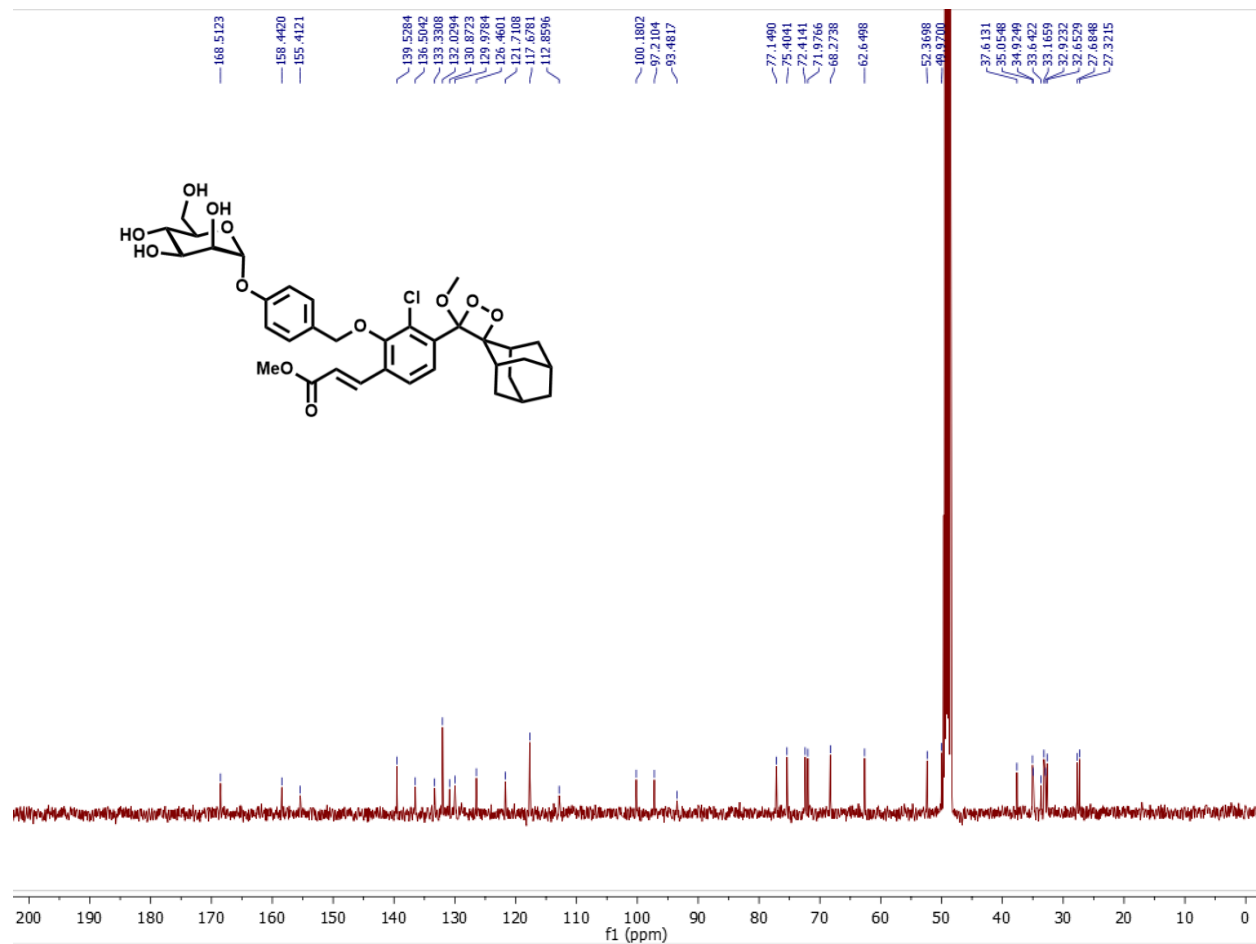

## HPLC (50-100% ACN gradient)

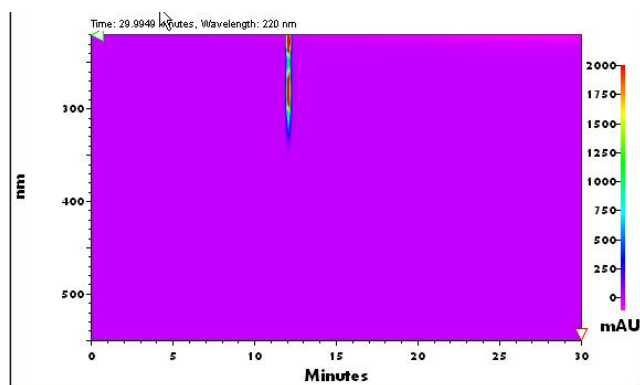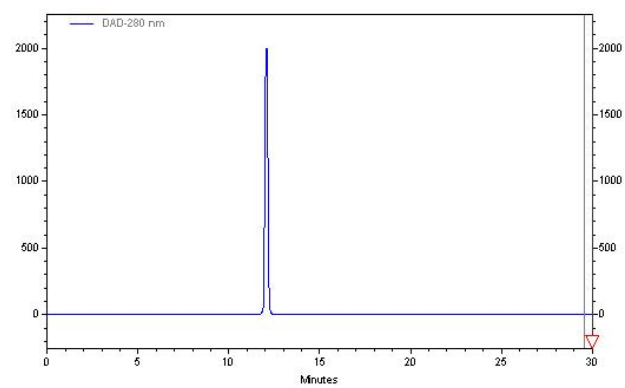

MS

1.39e6

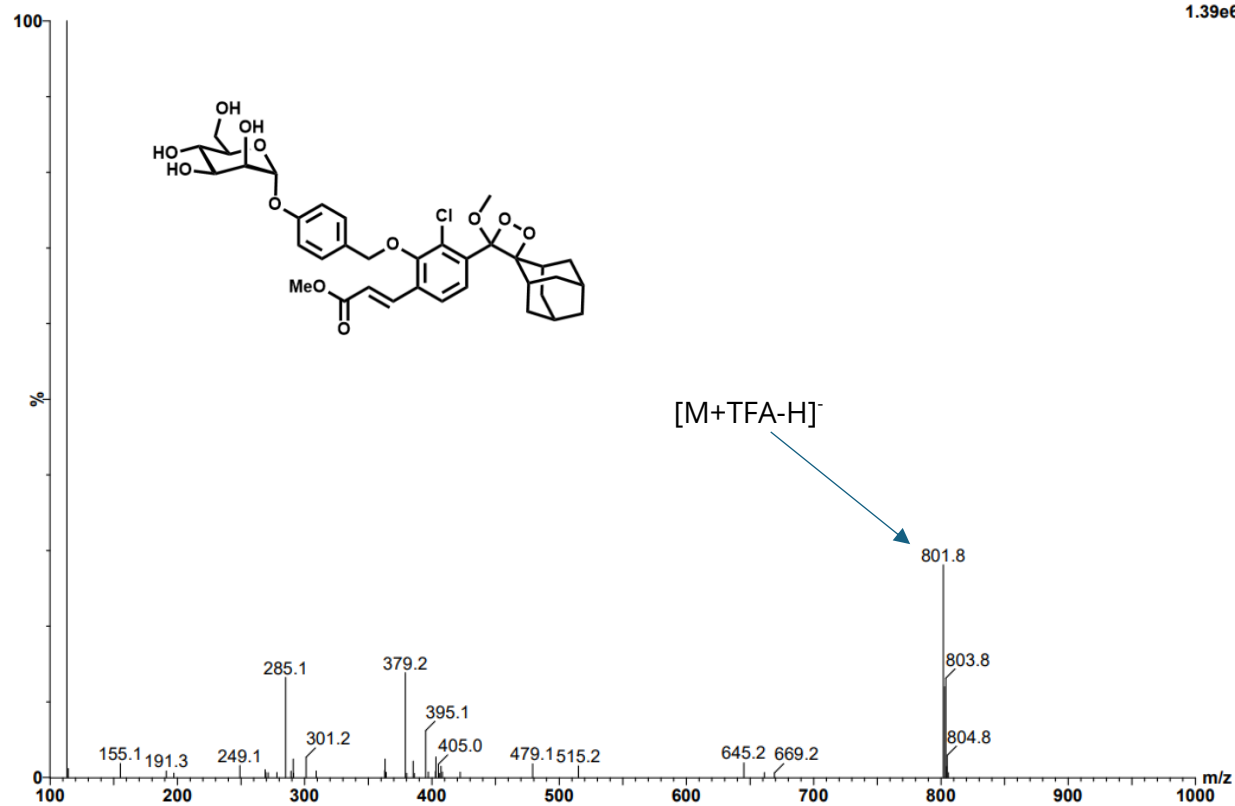

# $\alpha$ -man-MA-Diox 2:

## $^1\text{H-NMR}$

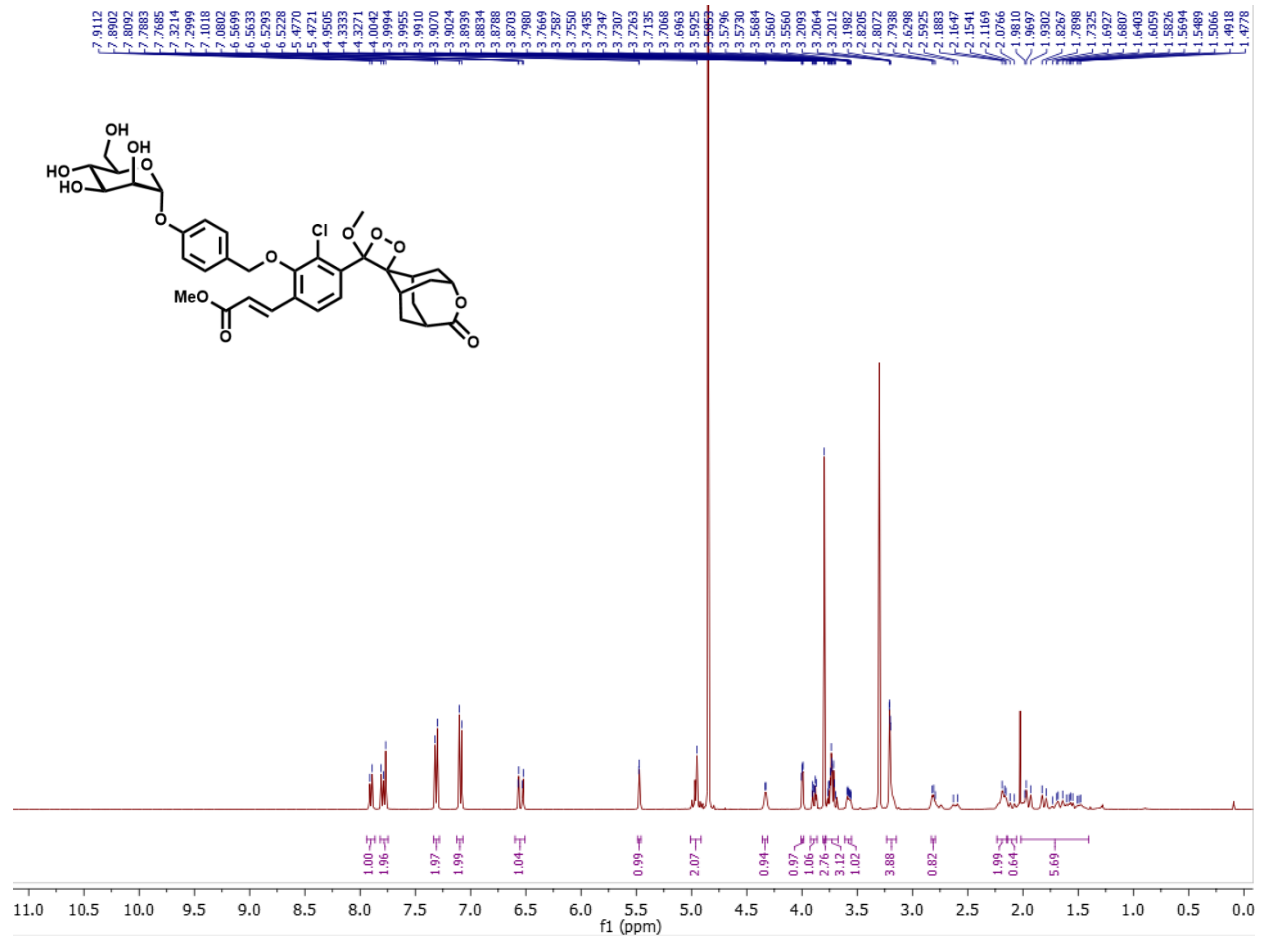

# <sup>13</sup>C-NMR

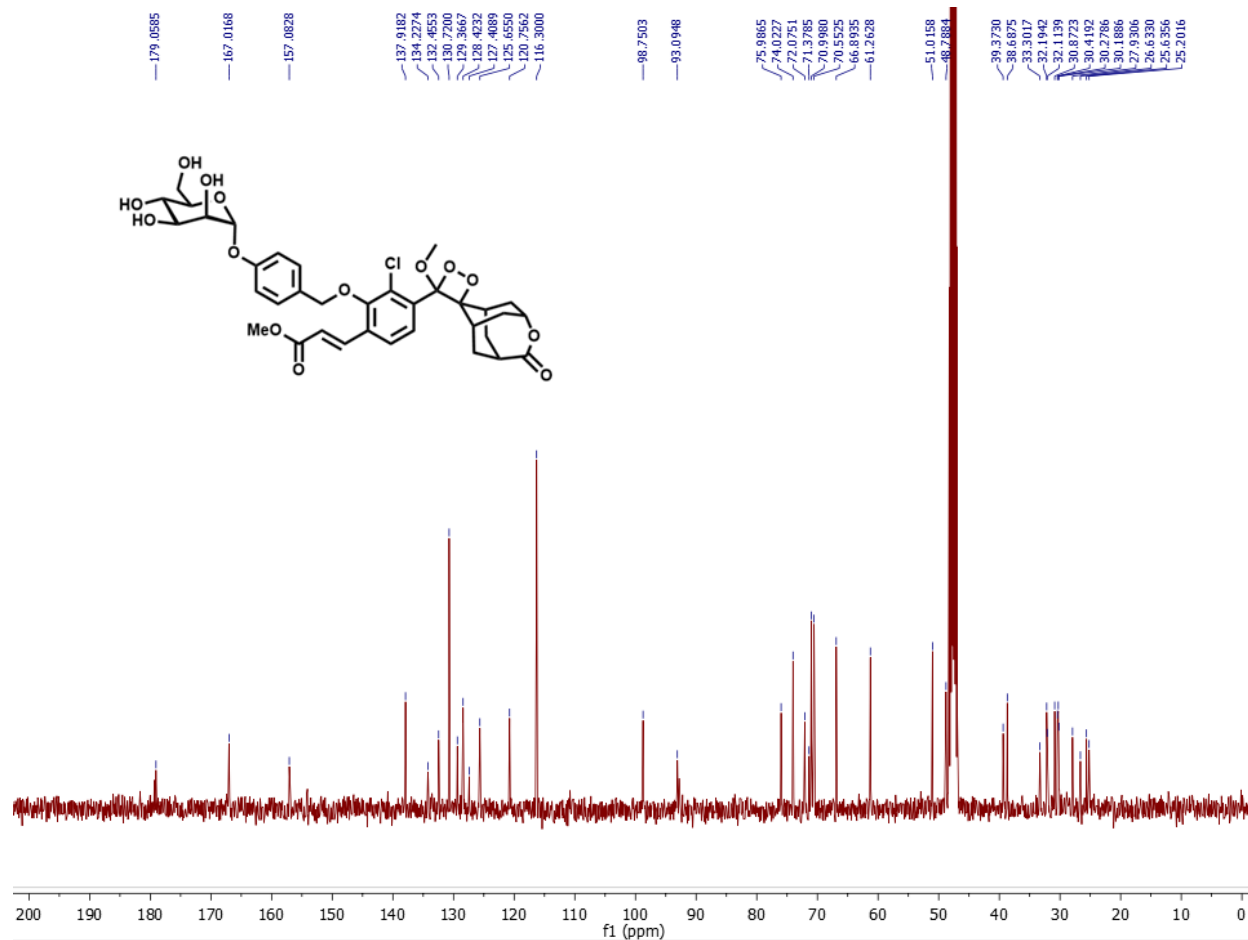

## HPLC (30-100% ACN gradient)

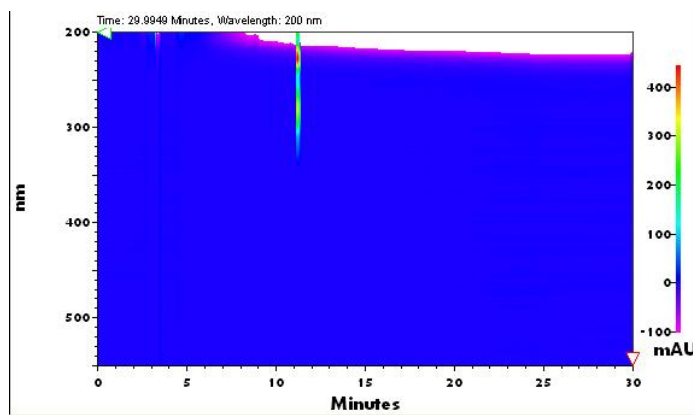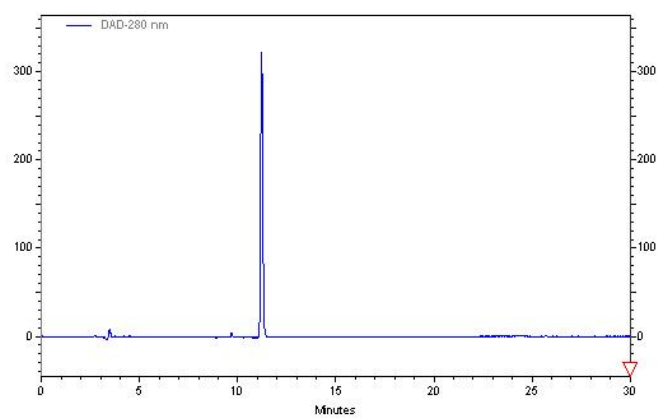

MS

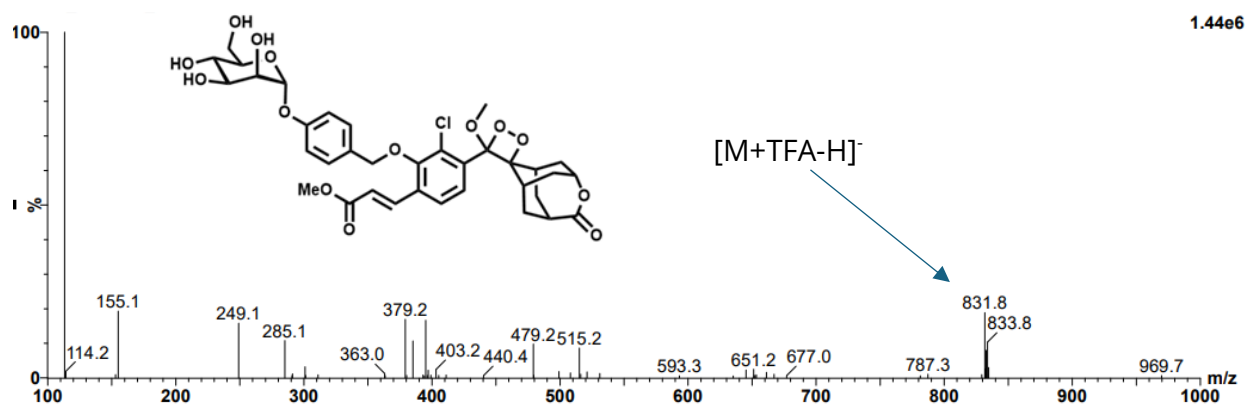

# NHMe-Diox 2:

## <sup>1</sup>H-NMR

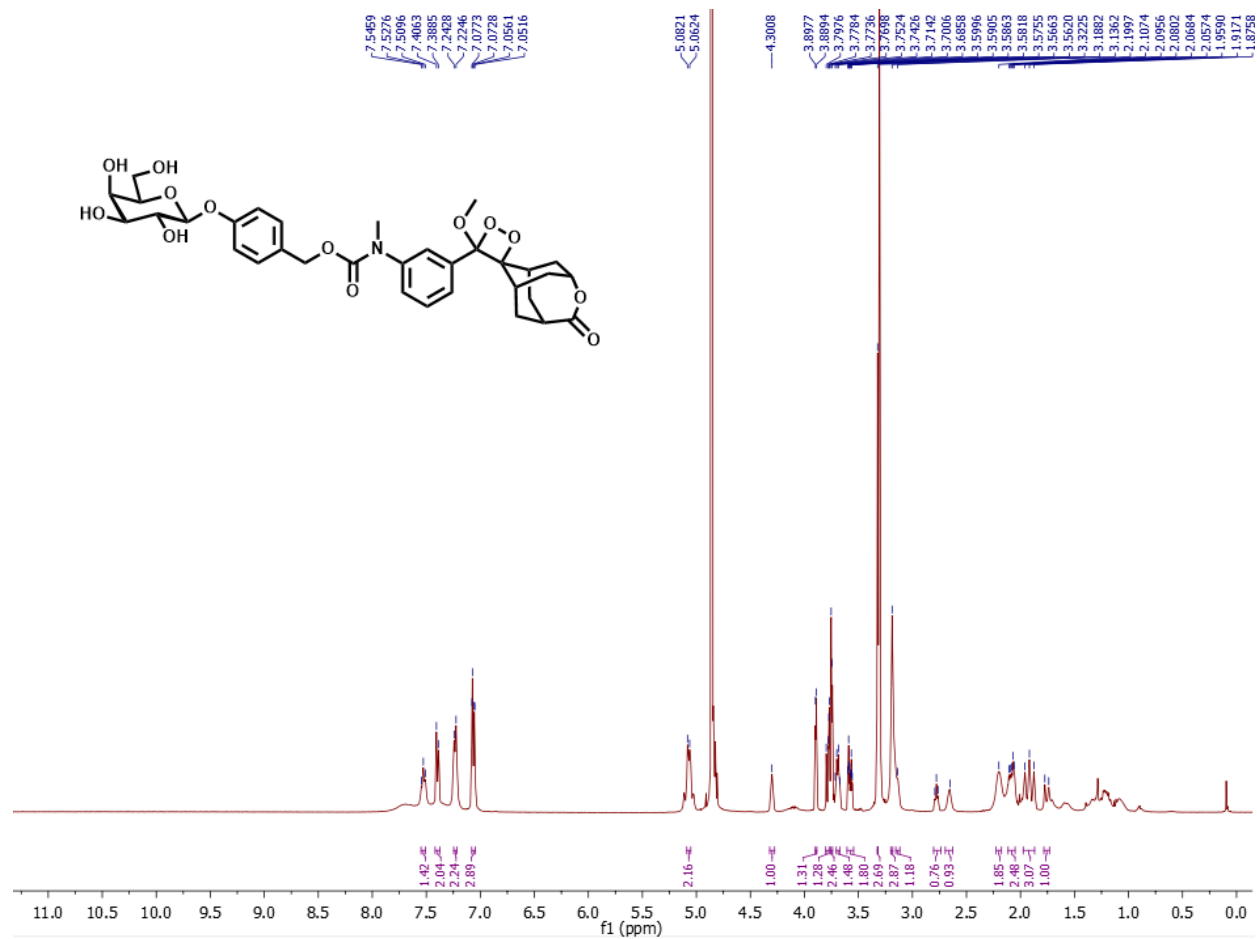

# <sup>13</sup>C-NMR

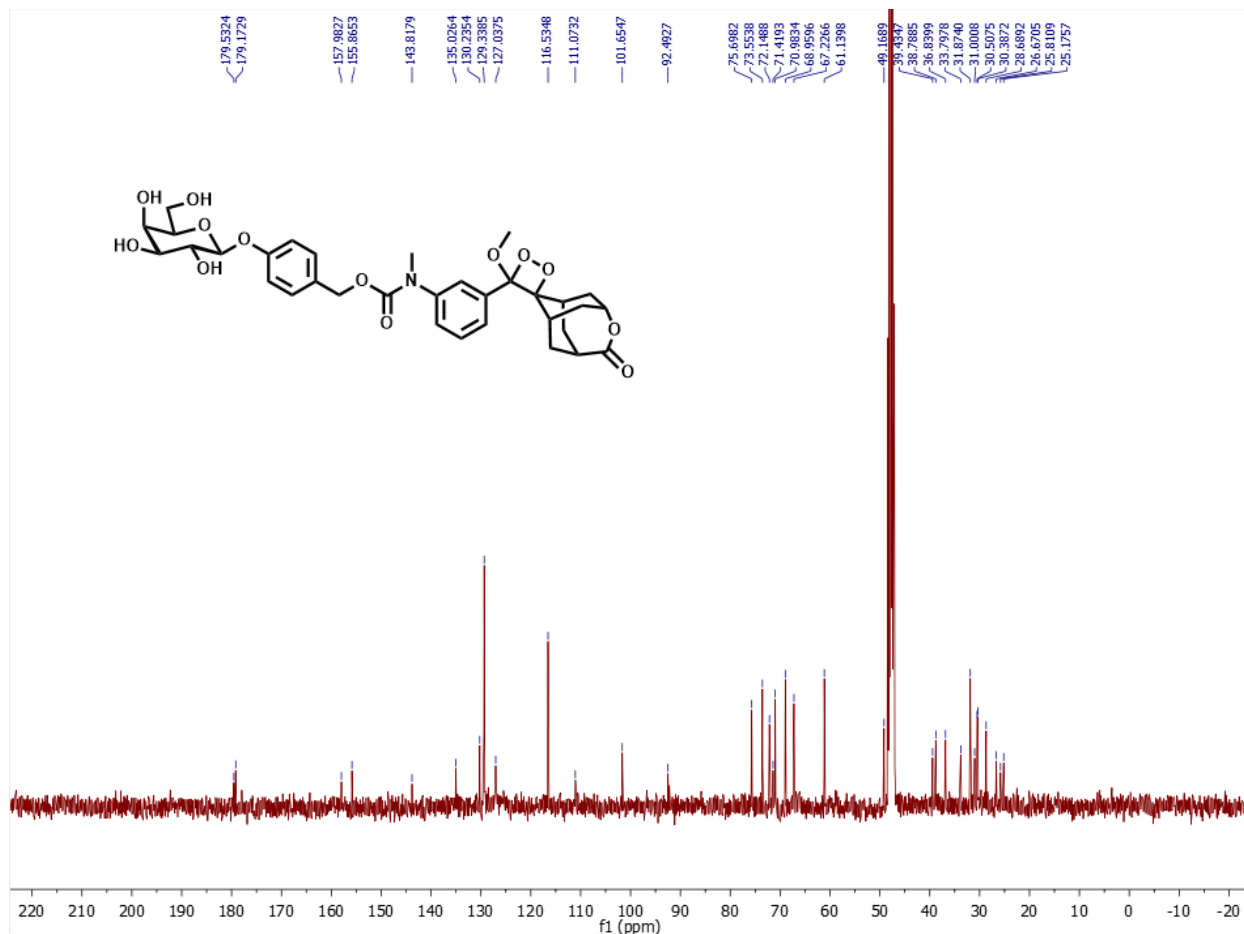

## HPLC (30-100% ACN gradient)

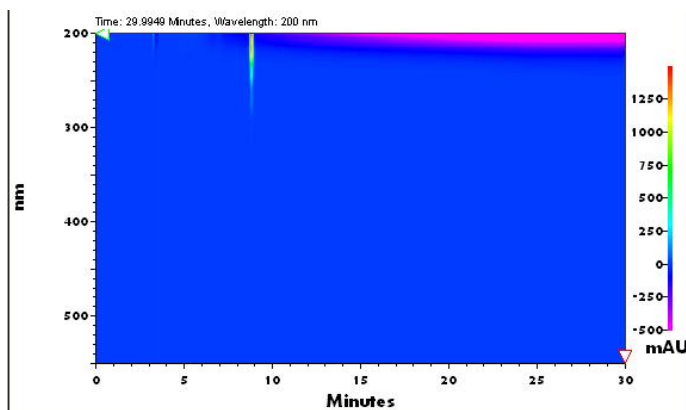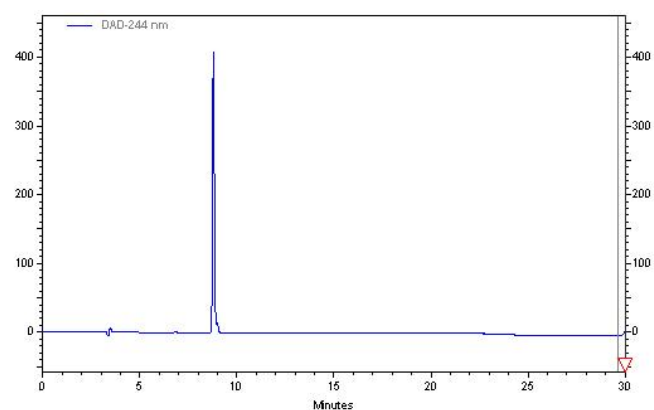

MS

1.94e6

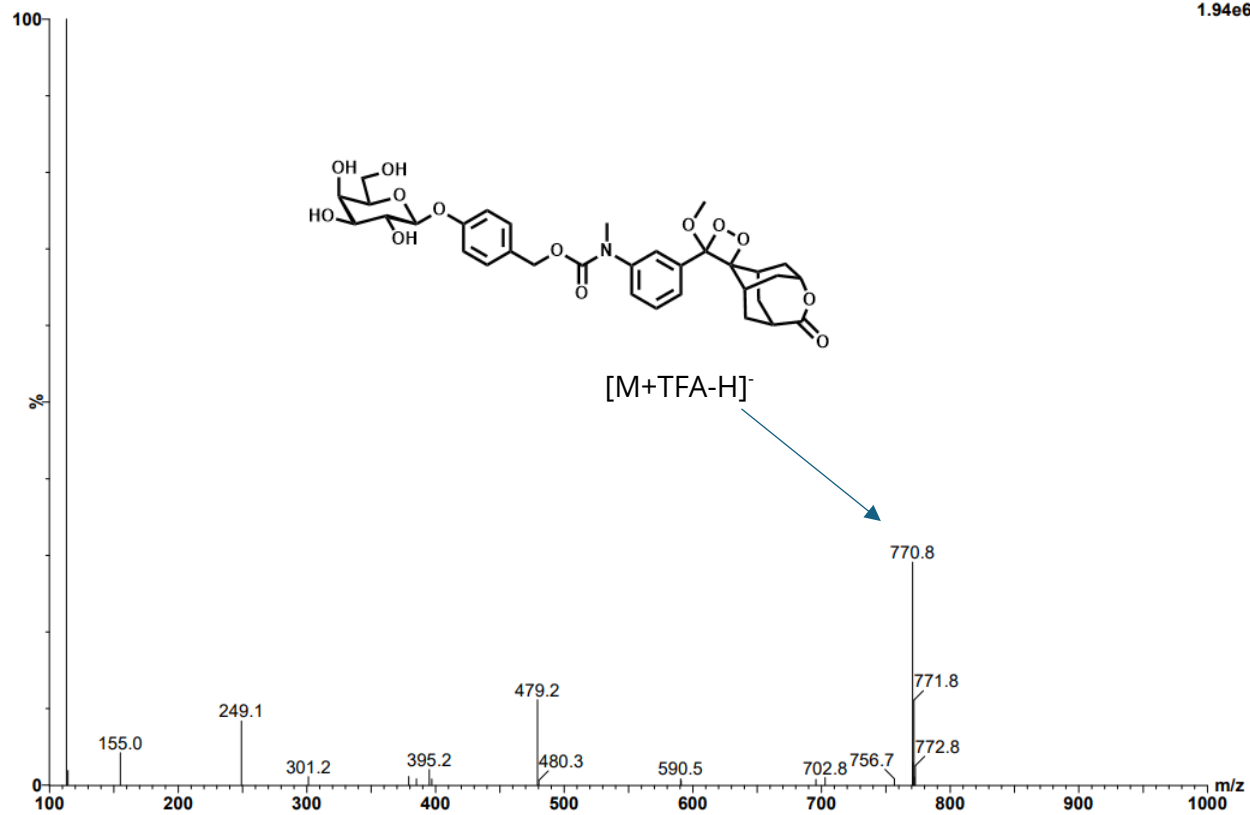

## References

- [1] S. Hisamatsu, S. Suzuki, S. Kohmoto, K. Kishikawa, Y. Yamamoto, R. Motokawa, T. Yaita, *Tetrahedron* 2017, **73**, 3993-3998.
- [2] O. Green, T. Eilon, N. Hananya, S. Gutkin, C. R. Bauer, D. Shabat, *ACS Cent. Sci.* 2017, **3**, 349-358.
- [3] H. Stetter, H.G. Thomas, *Angew. Chem. Int. Ed. Engl.*, 1967, **6**, 554-555
- [4] N. Hananya, A. E. Boock, C. R. Bauer, R. Satchi-Fainaro, D. Shabat, *J. Am. Chem. Soc.* 2016, **138**, 13438-13446.
- [5] M. David, T. Leirikh, N. Naama, T. Kopp, D. Shabat, *Angew. Chem. Int. Ed.*, 2025, **64**, e202515674.
